# Supplementary material for: Highly stable and strain-insensitive metal film conductors via manipulating strain distribution
Source: Royal Society of Chemistry journal article supplement (doi:10.1039/d3mh01399e), 2023-01-01
Supplement: d3mh01399e1.pdf [file d3mh01399e1.pdf]

# Supporting Information for

## Highly stable and strain-insensitive metal film conductors via manipulating strain distribution

Ting Zhu , Kai Wu \* , Yaqiang Wang , Jinyu Zhang , Gang Liu \* , Jun Sun \*

State Key Laboratory for Mechanical Behavior of Materials, Xi'an Jiaotong University, Xi'an,  
710049, P.R. China

\* *Corresponding authors: msewukai@xjtu.edu.cn; lgsammer@xjtu.edu.cn; junsun@xjtu.edu.cn*

### Table of Contents

|                                                   |           |
|---------------------------------------------------|-----------|
| <b>1. Supporting Information Figures</b> .....    | <b>2</b>  |
| <b>2. Supporting Information Tables</b> .....     | <b>32</b> |
| <b>3. Supporting Information References</b> ..... | <b>35</b> |

## 1. Supporting Information Figures

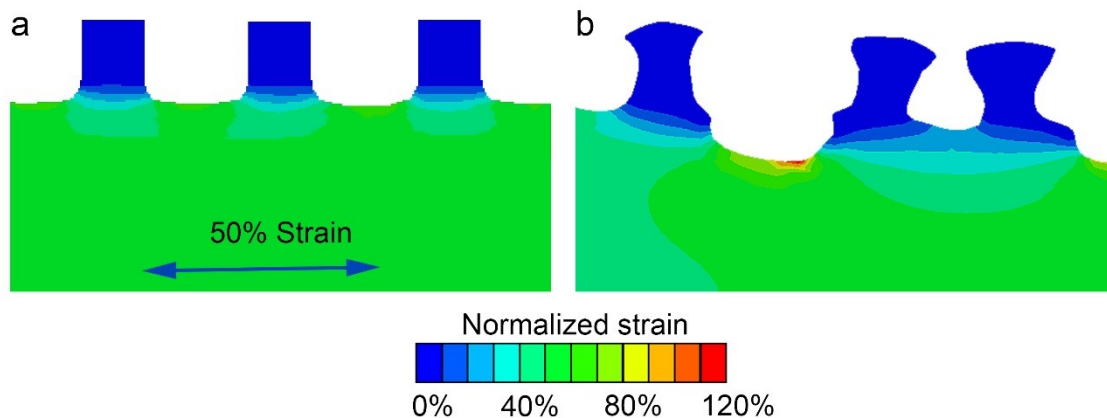

**Fig. S1.** Enlarged finite element analysis results of strain distribution in the film on (a) microstructured substrates corresponding to the black box in Fig. 1e-II (main text) and (b) hierarchical microstructured substrates corresponding to the purple box Fig. 1e- III (main text).

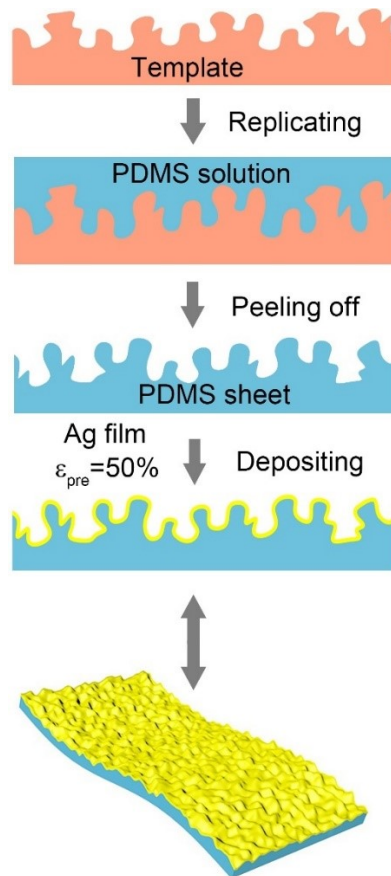

**Fig. S2.** Schematics of the fabrication process of Ag films on hierarchical microstructured substrates (HMFs).

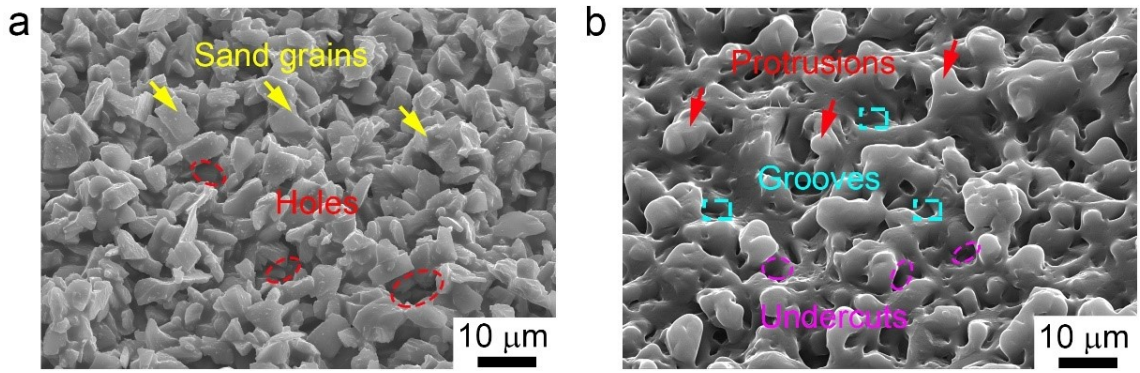

**Fig. S3.** 45° tilt-view SEM images of (a) sandpaper template and (b) microstructured PDMS sheet.

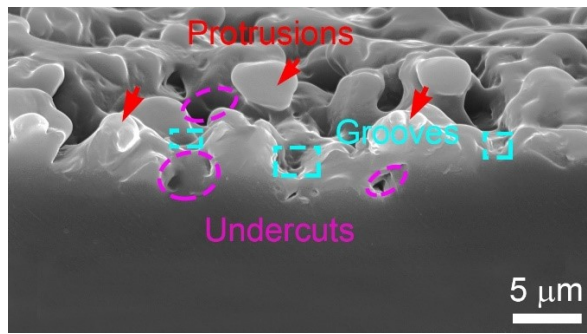

**Fig. S4.** Cross-sectional SEM image of the microstructured PDMS sheet, corresponding to Fig. 1g (main text).

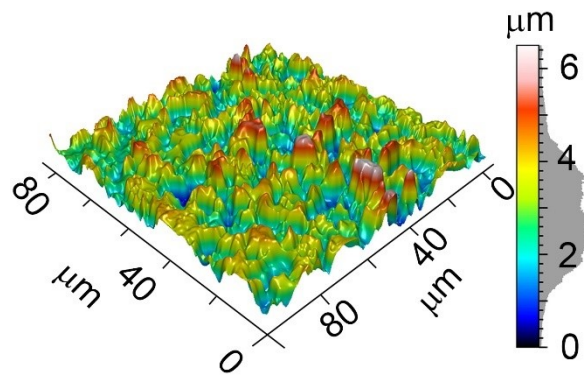

**Fig. S5.** Three-dimensional CLSM image of the PDMS sheet with protrusions, grooves, and undercuts microstructures.

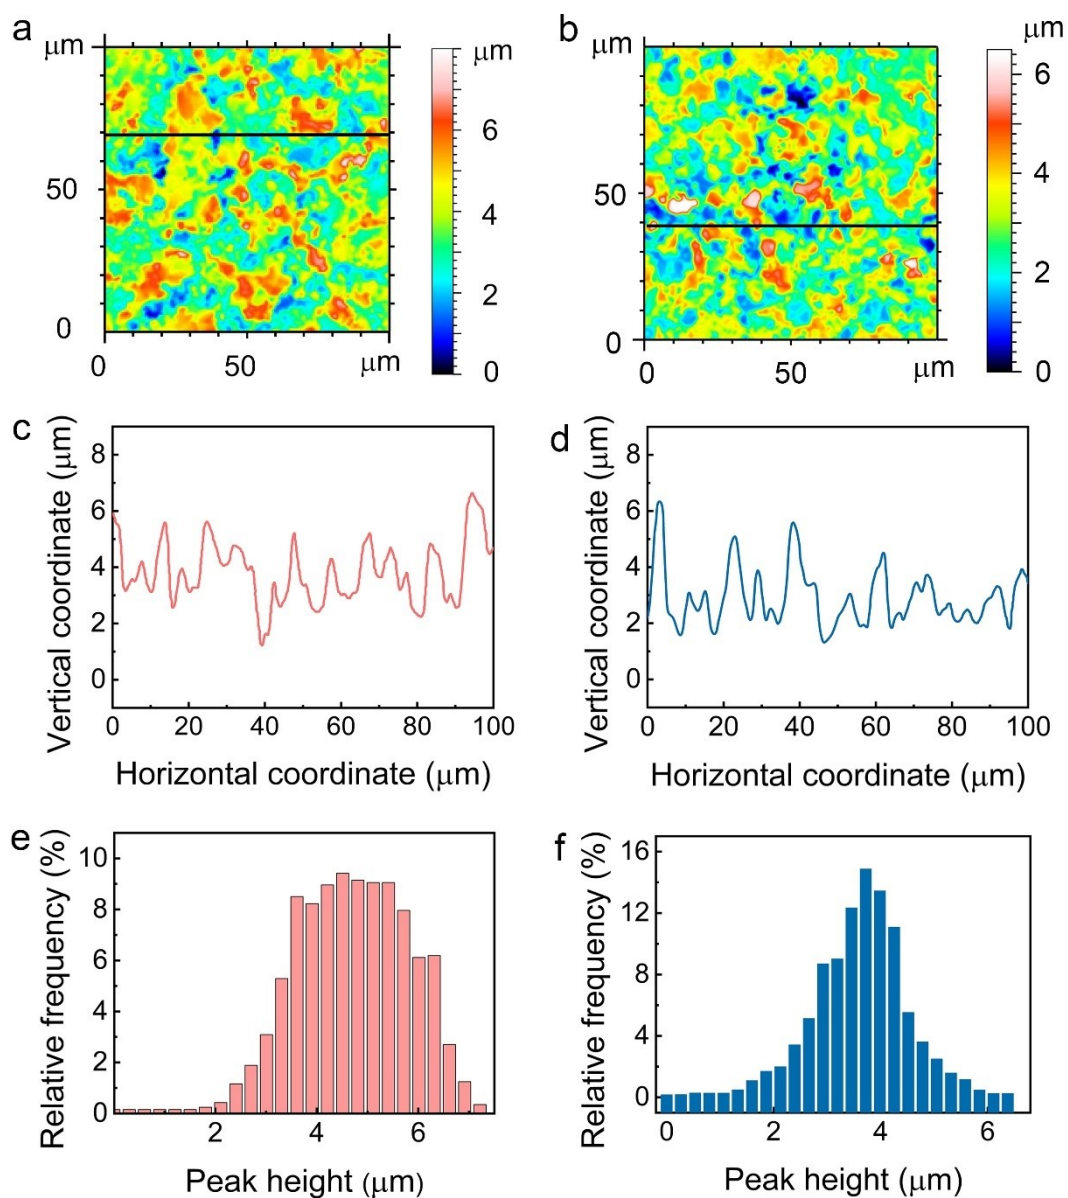

**Fig. S6.** Topographic images for top view obtained by CLSM analysis for the microstructures of (a) template and (b) PDMS sheet. (c) Height profile corresponding to line scan in (a). (d) Height profile corresponding to line scan in (b). (e) Peak height distribution of microstructures corresponding to (c). (f) Peak height distribution of microstructures corresponding to (d).

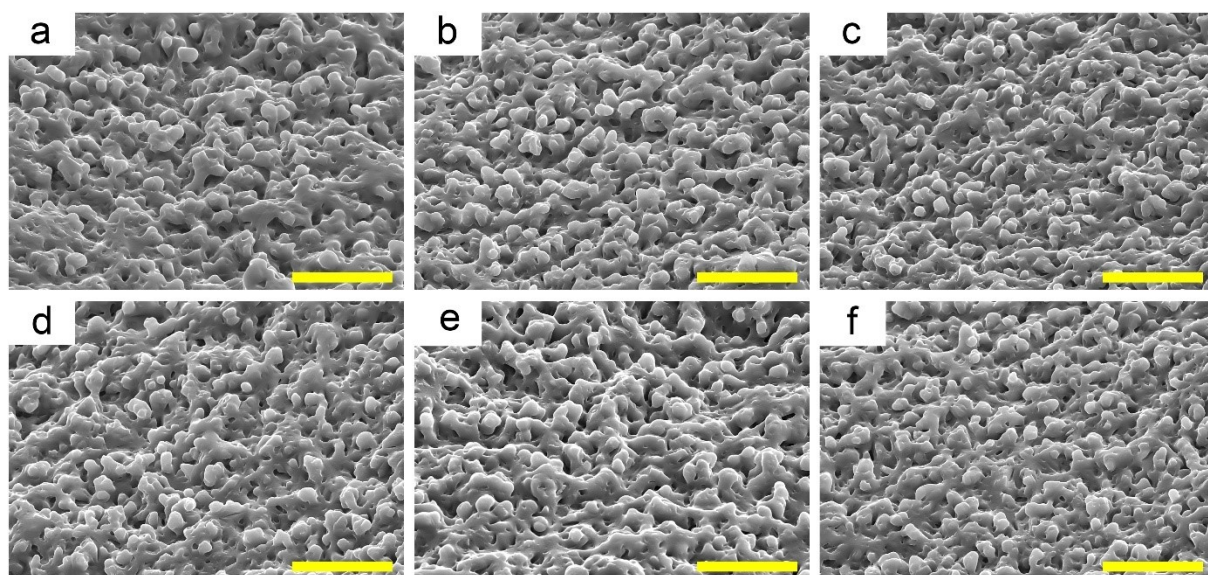

**Fig. S7.** 45° tilt-view SEM images of the microstructured PDMS sheets replicated from the template:

(a) 1<sup>st</sup> replication; (b) 4<sup>th</sup> replication; (c) 8<sup>th</sup> replication; (d) 12<sup>th</sup> replication; (e) 16<sup>th</sup> replication; (f) 20<sup>th</sup> replication (scale bar: 20  $\mu\text{m}$ ).



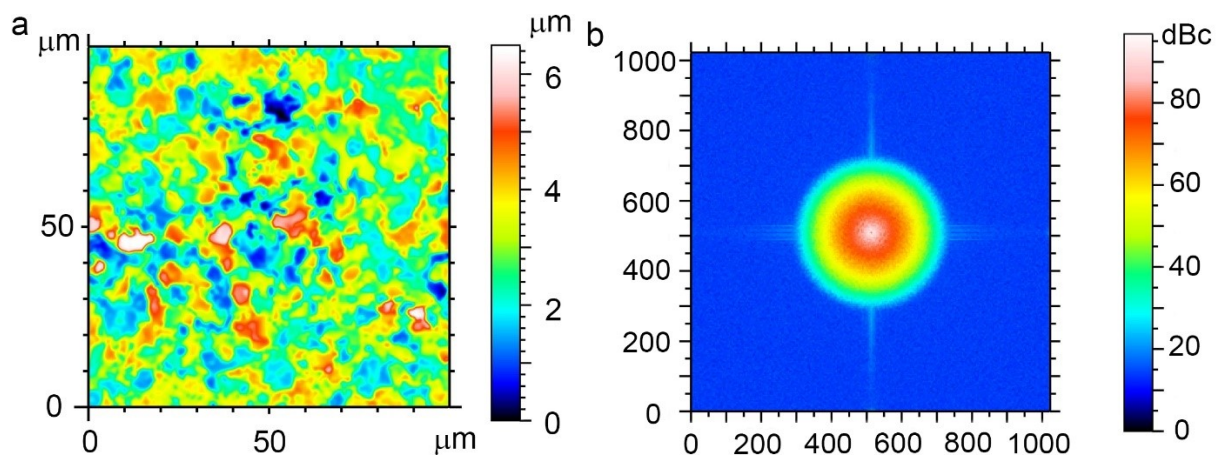

**Fig. S8.** (a) Top-view CLSM image of surface morphology of the microstructured PDMS sheet. (b)

Two-dimensional fast Fourier transform corresponding to (a).

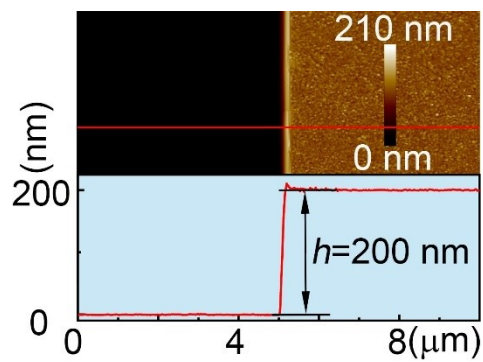

**Fig. S9.** AFM height image of the deposited 200 nm-thick Ag film on Si wafers.

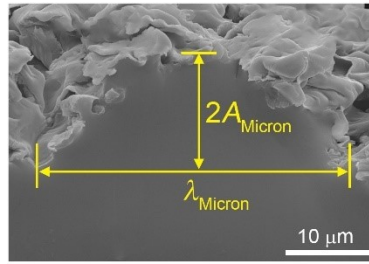

**Fig. S10.** Cross-sectional SEM image of the micron-scale wrinkle, corresponding to Fig. 1h (main text).

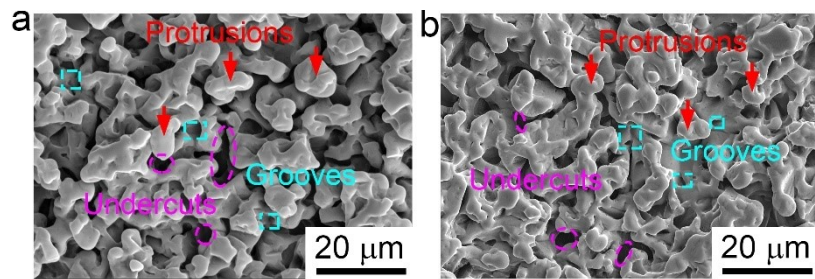

**Fig. S11.** SEM images of surface microstructures (a) before and (b) after introducing the micron- and submicron-scale wrinkles.

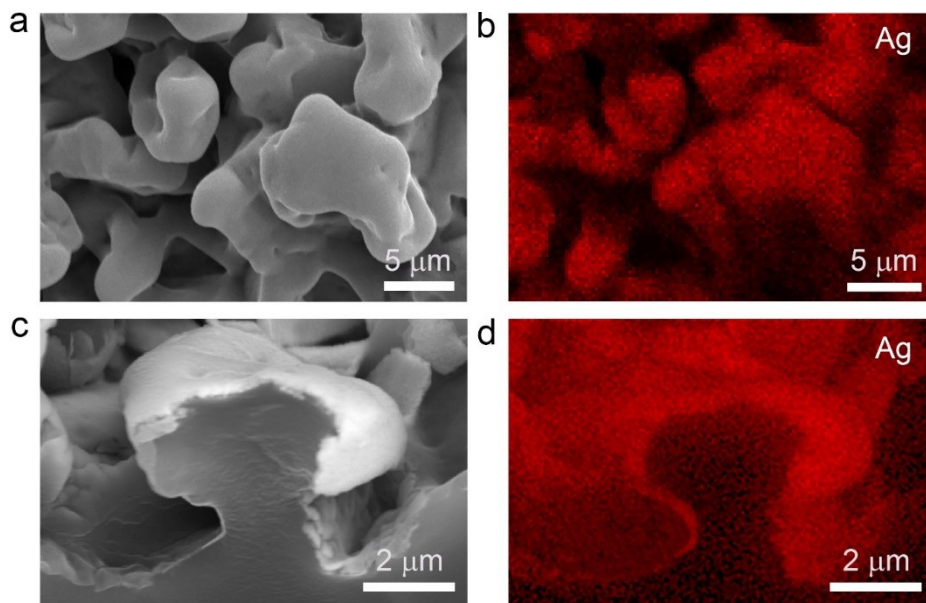

**Fig. S12.** (a) SEM image and (b) spatial energy dispersive X-ray spectroscopy (EDS) for the 200 nm-thick Ag film on 50% pre-stretched microstructured PDMS sheet. (c) Cross-section SEM image and (d) EDS for the 200 nm-thick Ag on 50% pre-stretched microstructured PDMS sheet.

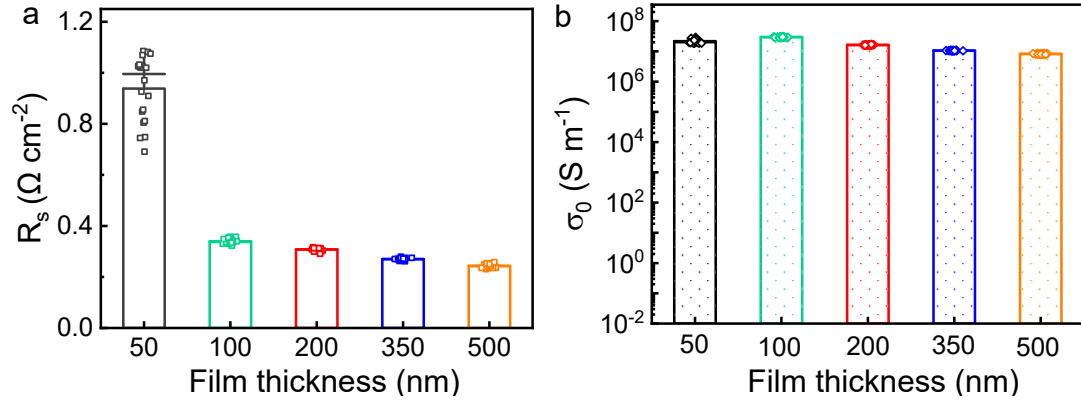

**Fig. S13.** Variation of (a) sheet resistance ( $R_s$ ) and (b) initial conductivity ( $\sigma_0$ ) of Ag films with film thickness on 50% pre-stretched microstructured PDMS sheets.

Sheet resistance ( $R_s$ ) can be described by the following equation <sup>1</sup>:

$$R_s = \frac{1}{\sigma h} \quad (1)$$

where  $\sigma$  is conductivity, and  $h$  is the thickness of metal film.

Based on Equation. (1), the conductivity ( $\sigma$ ) can be calculated as:

$$\sigma = \frac{1}{R_s h} \quad (2)$$

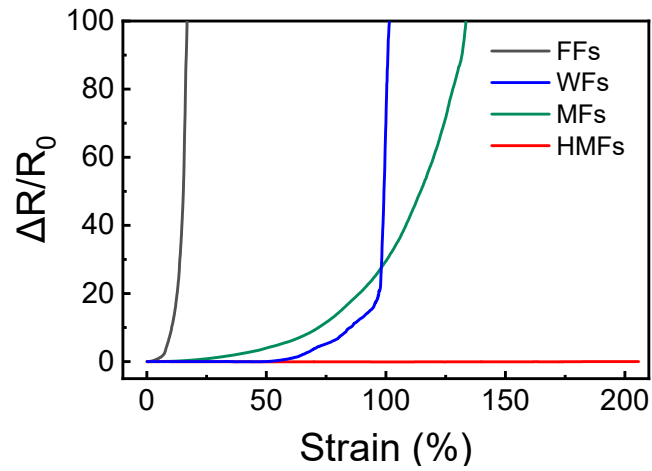

**Fig. S14.** Relative change resistance ( $\Delta R/R_0$ ) as a function of strain for the Ag films on hierarchical microstructured substrates (HMFs), the Ag films on flat substrates (FFs), the Ag films on microstructured substrate without wrinkles (MFs) and Ag films on wrinkled substrate without microstructures (WFs).

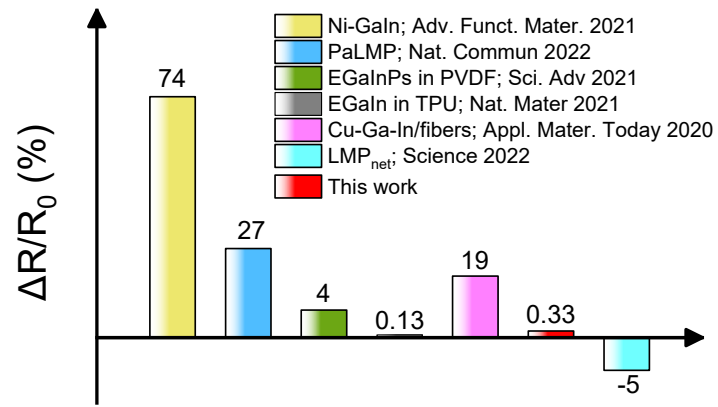

**Fig. S15.** Comparison of the relative resistance change at 200% strain of this work with previous liquid metal-based stretchable conductor<sup>2-7</sup>.



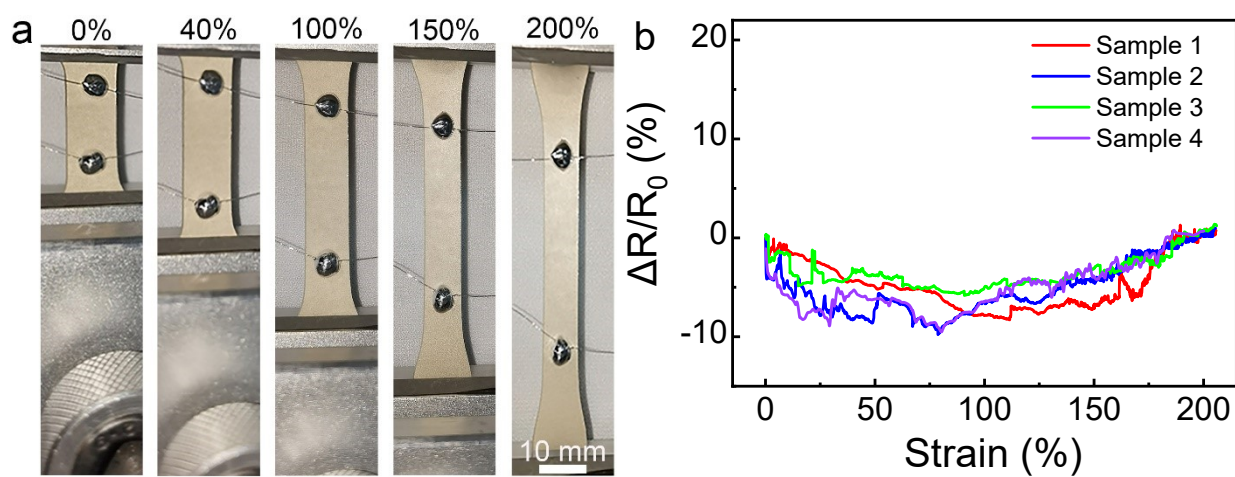

**Fig. S16.** (a) Digital images of the HWFs at sequential applied tensile strains. (b) Electromechanical performances of the HWFs fabricated simultaneously under the same deposition condition.

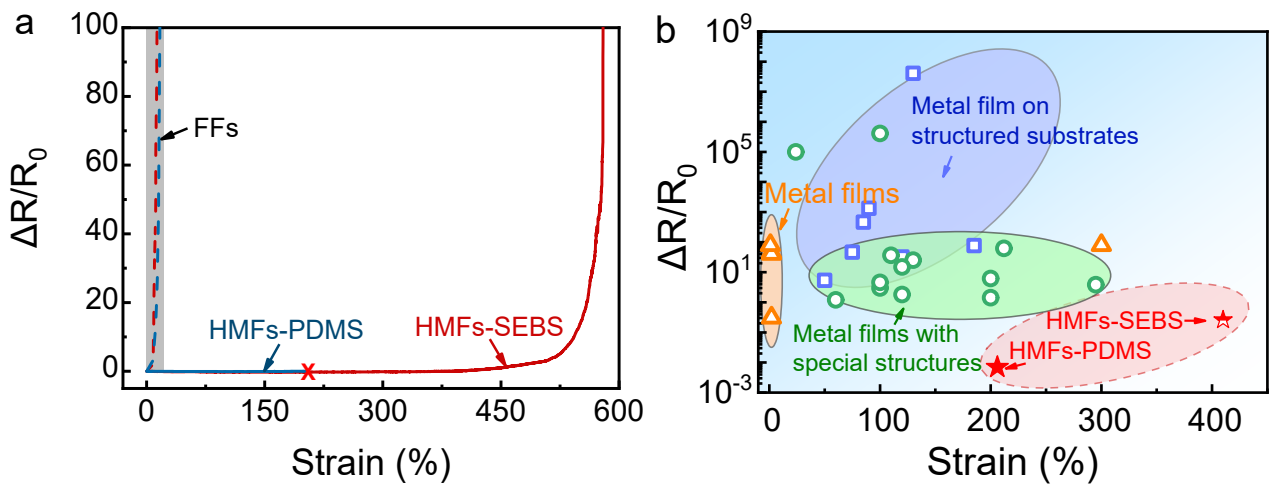

**Fig. S17.** (a) Relative resistance change ( $\Delta R/R_0$ ) of the different substrates-supported FFs and HMFs as a function of tensile strain. (b) Relative resistance change versus stretchability of HMFs, in comparison with other metal-based stretchable conductors<sup>8-32</sup>.

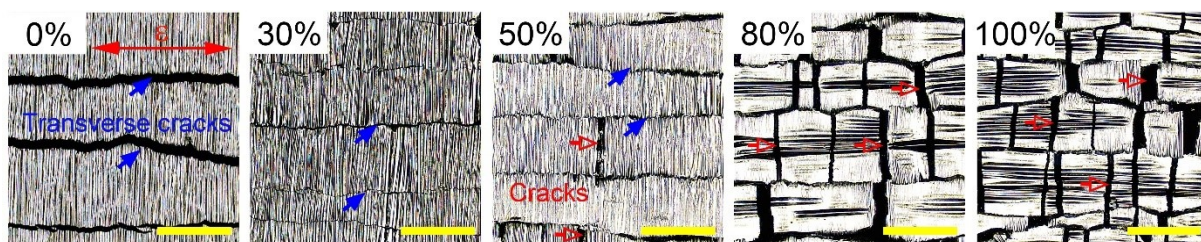

**Fig. S18.** CLSM images of the surface morphologies of the WFs at sequential strains, illustrating the cracking process (scale bar:200  $\mu\text{m}$ ).

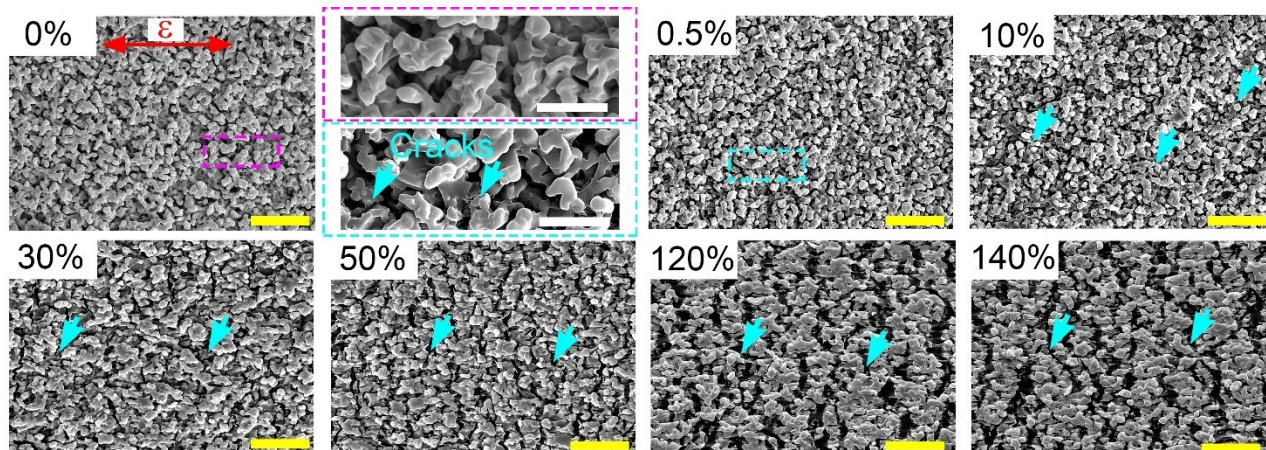

**Fig. S19.** SEM images of the surface morphologies of the MFs at sequential strains, illustrating the cracking process (yellow scale bar: 200  $\mu\text{m}$ ; white scale bar: 20  $\mu\text{m}$ ).

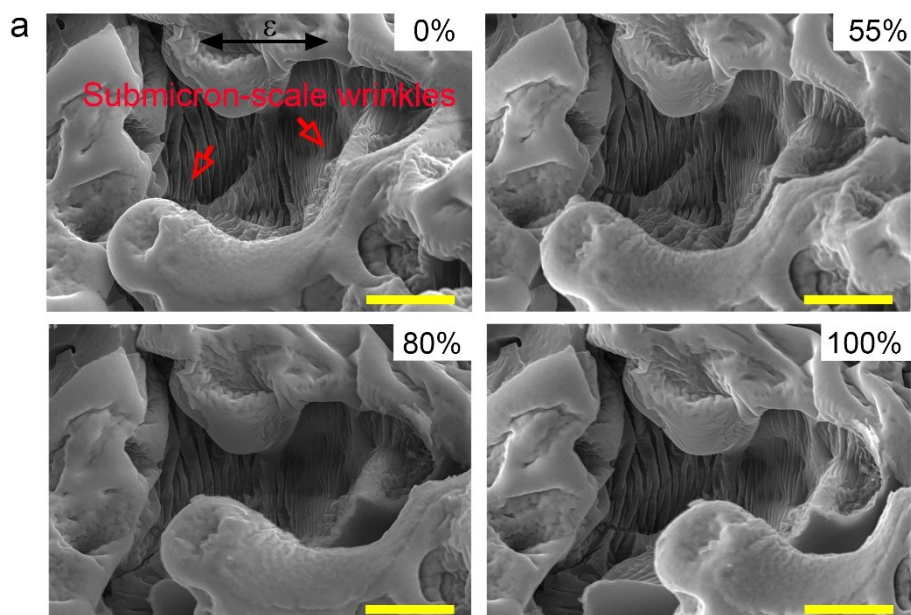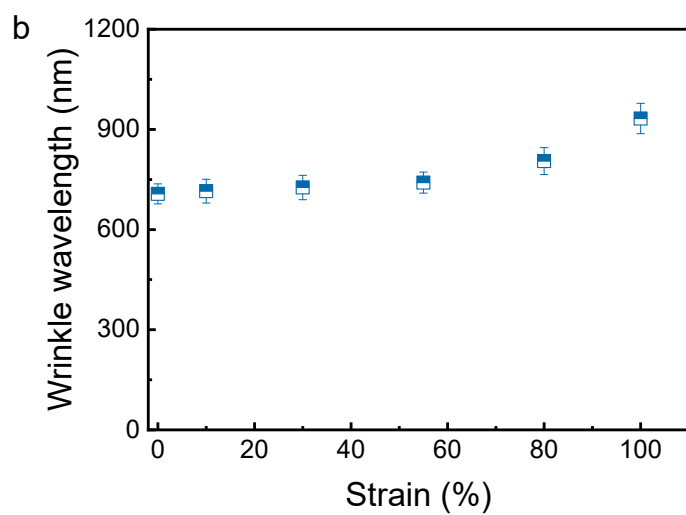

**Fig. S20.** (a) SEM images of the submicron-scale wrinkles at an undercut under sequential strains (scale bar: 5  $\mu\text{m}$ ). (b) Evolution of average wrinkle wavelength with applied strain for submicron-scale wrinkles.

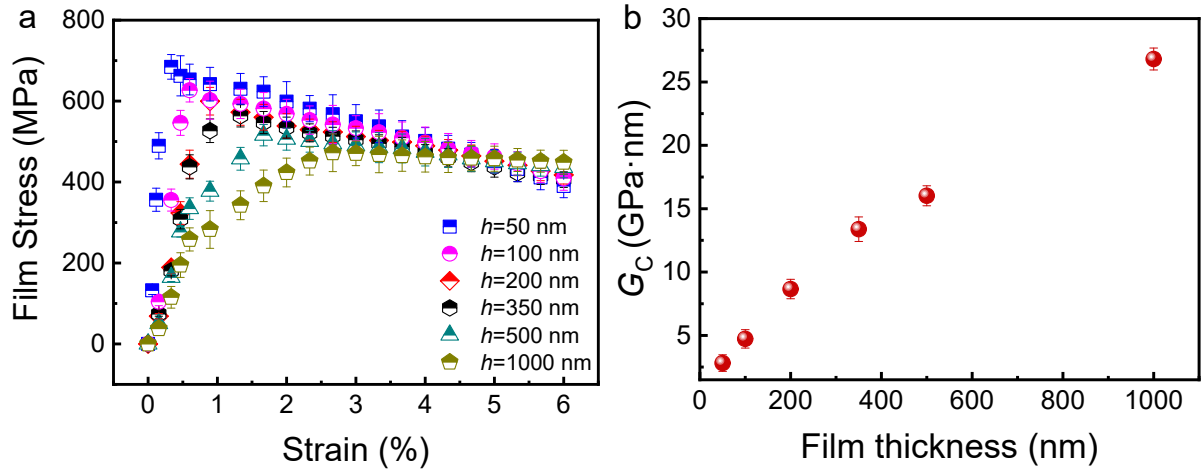

**Fig. S21.** (a) Evolution of film stress with applied strain for Ag films with different film thicknesses on flat PDMS substrates. (b) Variation of critical energy release rate  $G_C$  with film thickness for Ag films on flat PDMS substrates.

According to the linear elastic fracture mechanics, the steady state crack propagation can be described analytically by two-dimensional models<sup>33</sup>. The critical energy release rate  $G_C$  associated with the steady-state crack propagation in a brittle film (such as nanocrystalline metal film) on a substrate is given by<sup>33</sup>:

$$G = \frac{\pi\sigma^2 h}{2E_f} (1 - \nu_f^2) g(\alpha, \beta) \quad (1)$$

where  $\sigma$  is the fracture stress of the film which can be determined from the stress-strain curve obtained by synchrotron X-ray diffraction,  $h$  is the film thickness,  $E_f$  is the elastic modulus of the film,  $\nu_f$  is the Poisson's ratio of the film, and  $g(\alpha, \beta)$  is a dimensionless parameter depending on the Dundurs parameters ( $\alpha$  and  $\beta$ ). The formulas for  $\alpha$  and  $\beta$  are as follows:

$$\alpha = \frac{\bar{E}_f - \bar{E}_s}{\bar{E}_f + \bar{E}_s} \quad (2)$$

$$\beta = \frac{\mu_f(1 - 2\nu_s) - \mu_s(1 - 2\nu_f)}{2\mu_f(1 - \nu_s) + 2\mu_s(1 - \nu_f)} \quad (3)$$

where  $\bar{E} = \frac{E}{1-\nu^2}$ ,  $\mu$  is the shear modulus and the subscripts  $f$  and  $s$  denote the film and the substrate, respectively.

Substitution of these values (Table S3) into the above equations, we calculated the critical energy release rate of Ag films with different film thicknesses (Fig. S21b). If the energy release rate  $G$  in film exceeds the critical value  $G_C$ , the crack will propagate. When  $G < G_C$ , the crack arrests.

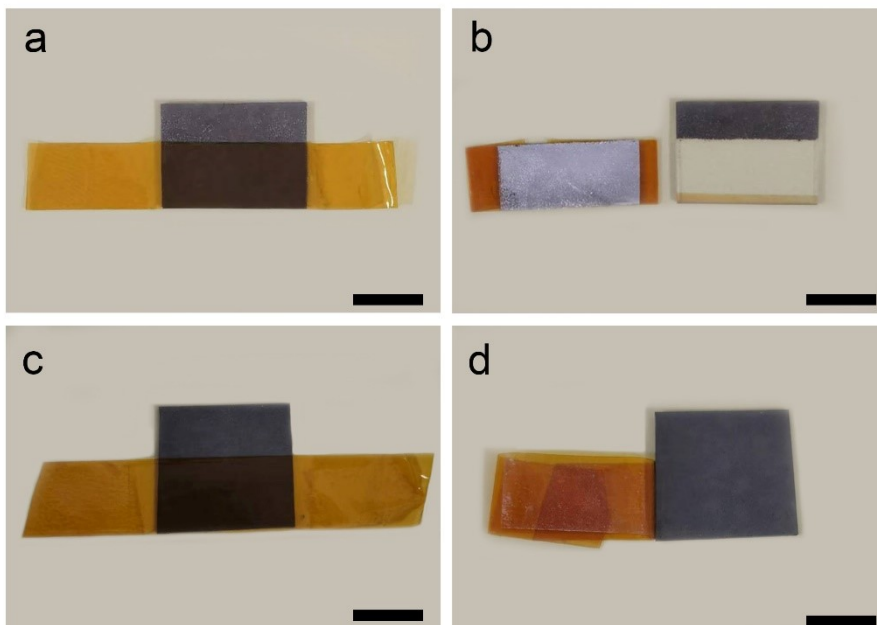

**Fig. S22.** Adhesion measurement by Kapton tape peel test. (a-b) FFs and (c-d) HMFs (scale bar: 5 mm).



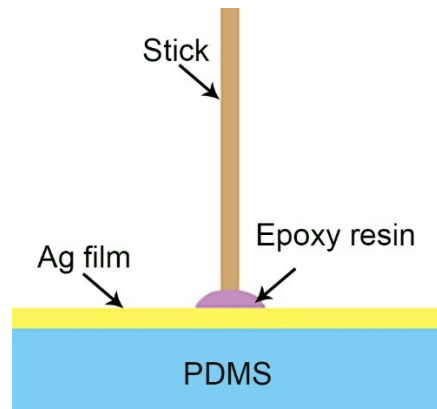

**Fig. S23.** Schematic of the experimental setup by pull-out test.

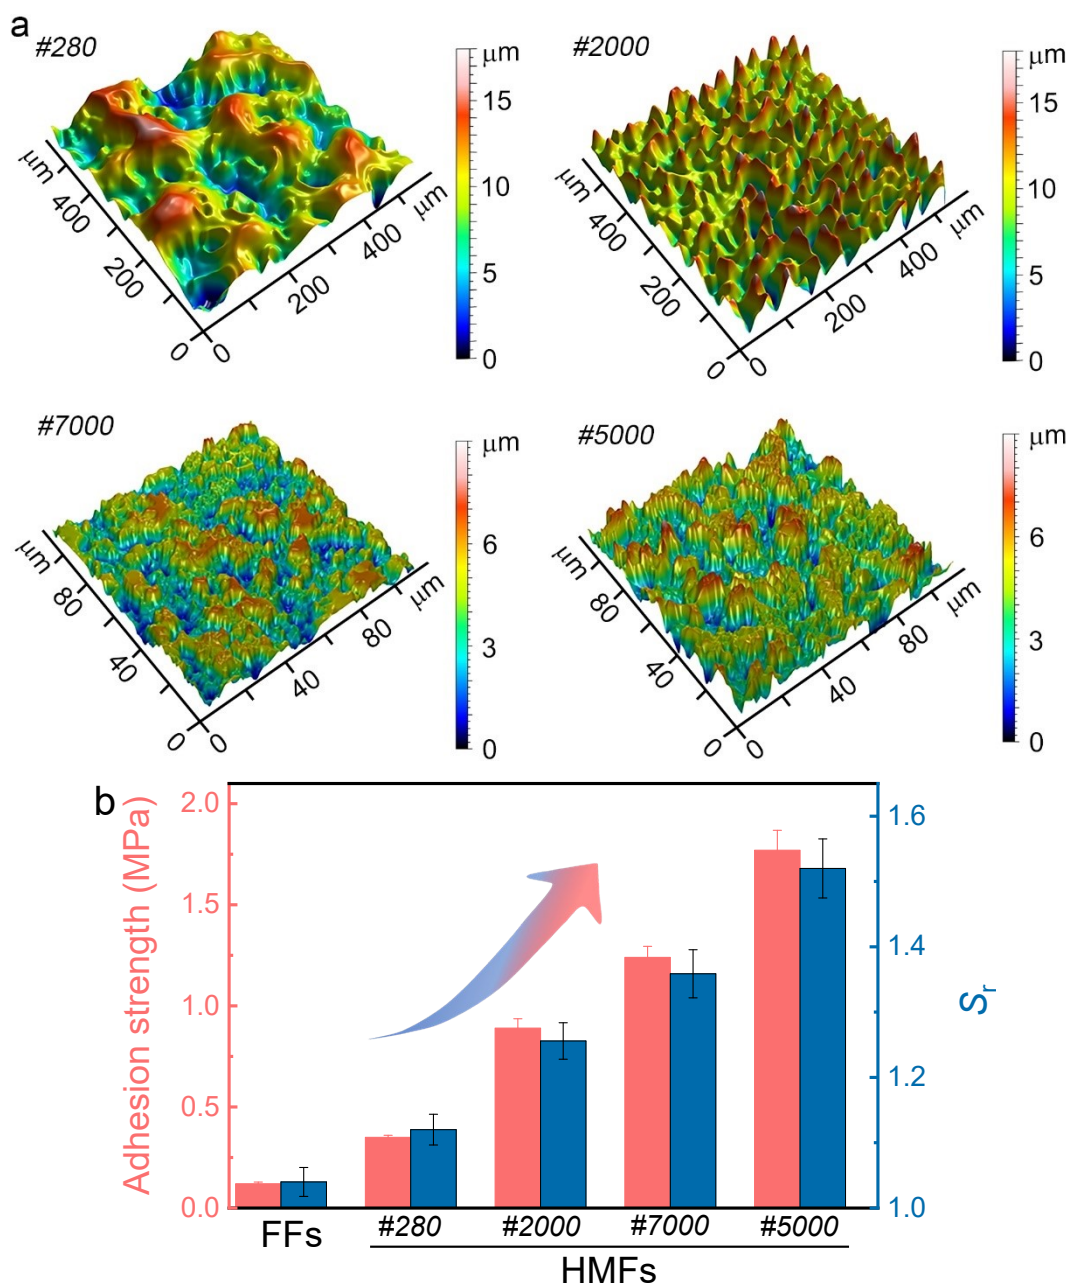

**Fig. S24.** (a) Three-dimensional CLSM images of the microstructured PDMS sheets molded from different sandpapers. (b) Interfacial adhesion strength and area ratio  $S_t$  for Ag films on flat PDMS substrates and microstructured PDMS substrates. In this work, the #5000 sandpaper with better interfacial adhesion strength is selected as the template to fabricate the metal film-based stretchable conductor and explore the electromechanical performances.

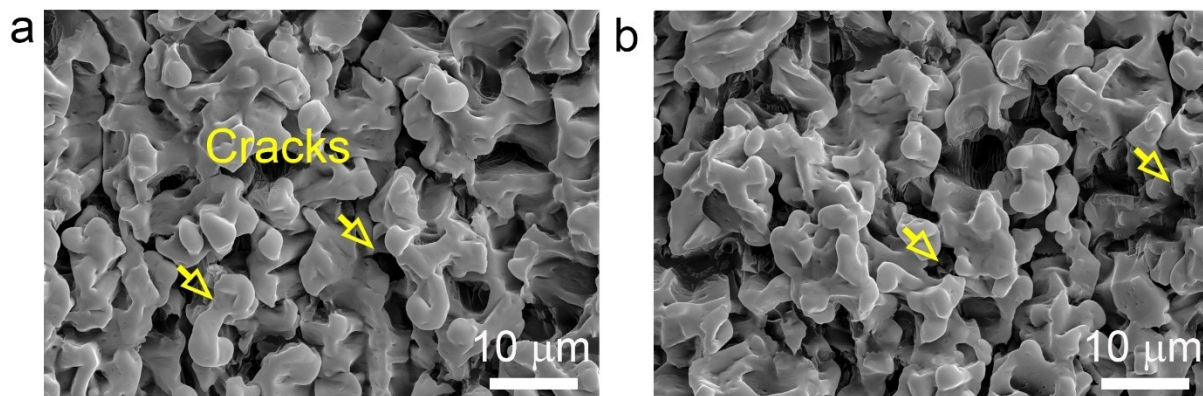

**Fig. S25.** SEM images of the surface morphologies of HMFs before and after 15000 cycles at 100%.

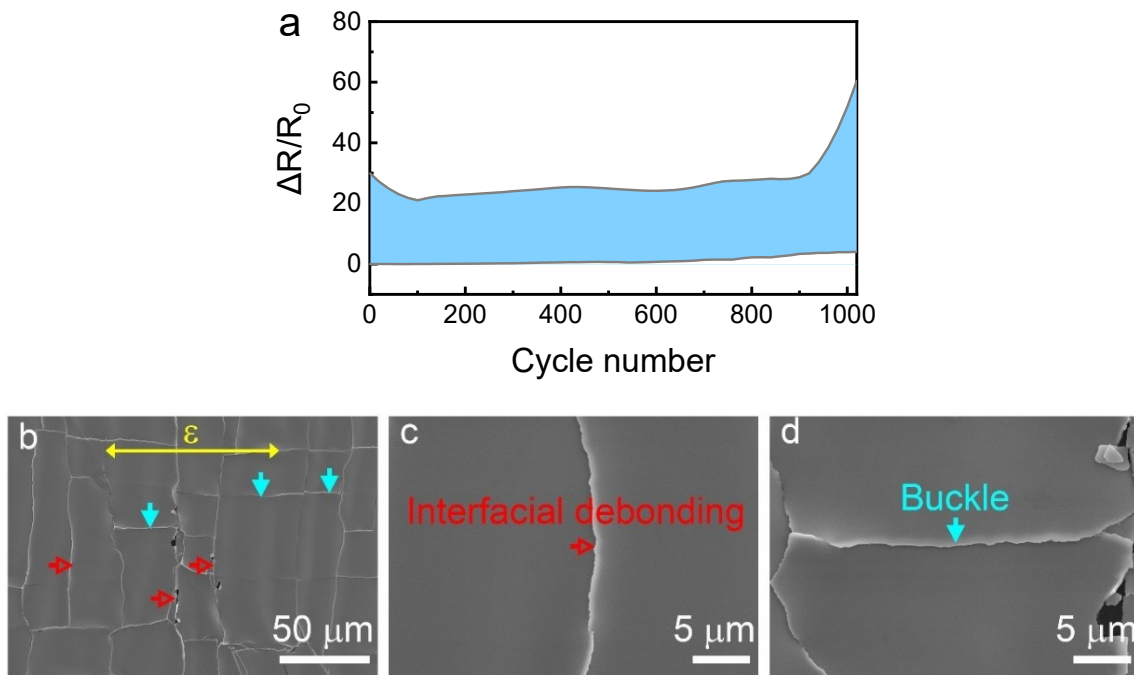

**Fig. S26.** (a) Relative resistance change versus cycle number at 10% strain. (b) SEM image morphology of the FFs after 1000 cycles at 10% strain. (c) Enlarged image of the interfacial debonding along the cracks. (d) Enlarged image of a buckle (delaminated region between two cracks).

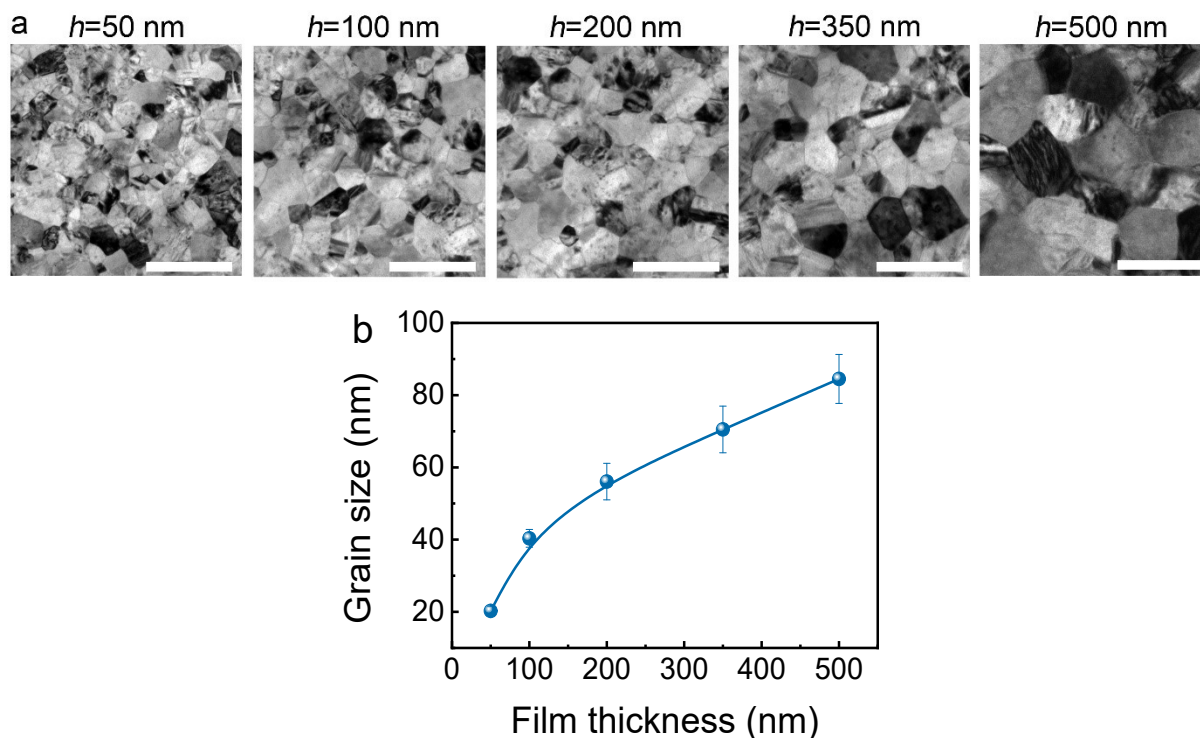

**Fig. S27.** (a) TEM images of Ag films with different thicknesses (scale bar: 100 nm). (b) Dependence of average grain size on film thickness measured by TEM.

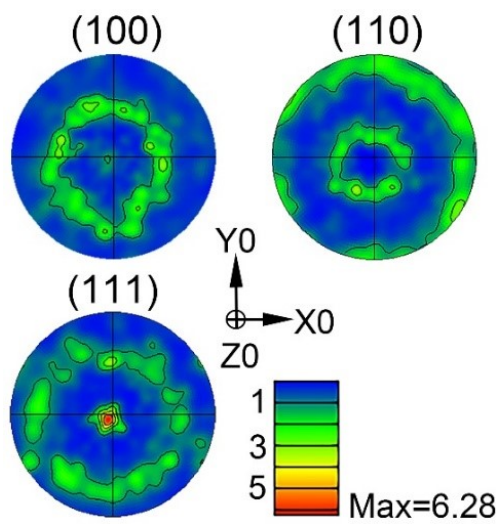

**Fig. S28.** Pole figures of 200 nm-thick Ag film, corresponding to Fig. 3f (main text).

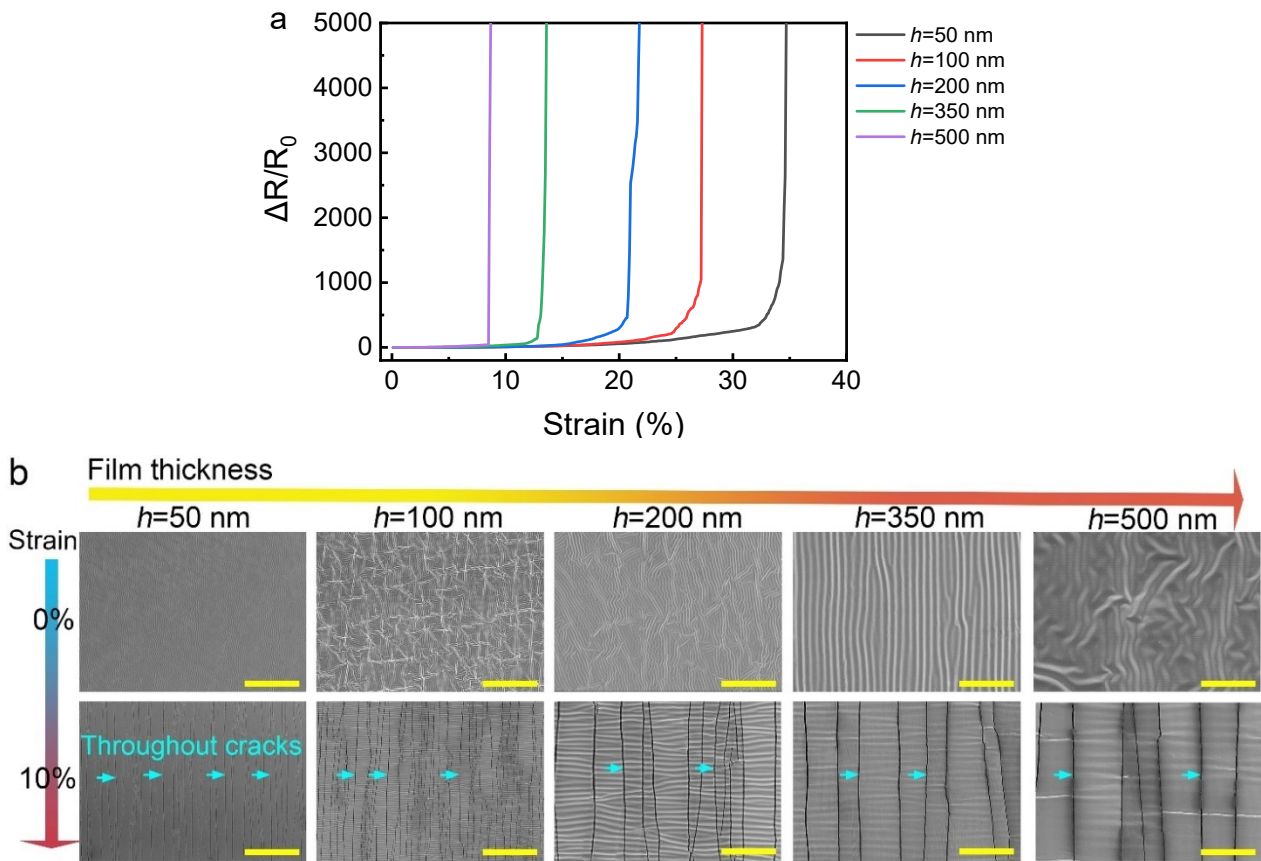

**Fig. S29.** (a) Variation of relative resistance change with applied strain for the FFs with different thicknesses. (b) SEM images of surface morphologies of the FFs with different thicknesses at 0% and 10% (scale bar: 300  $\mu\text{m}$ ). The local energy release rate  $G$  (the crack propagation driving force) and the critical energy release rate  $G_C$  increase monotonically with the increase of film thickness. Obviously, for FFs, the monotonic decrease of the stretchability with the increase of film thickness because the film always has a higher crack propagation driving force ( $G > G_C$ ).

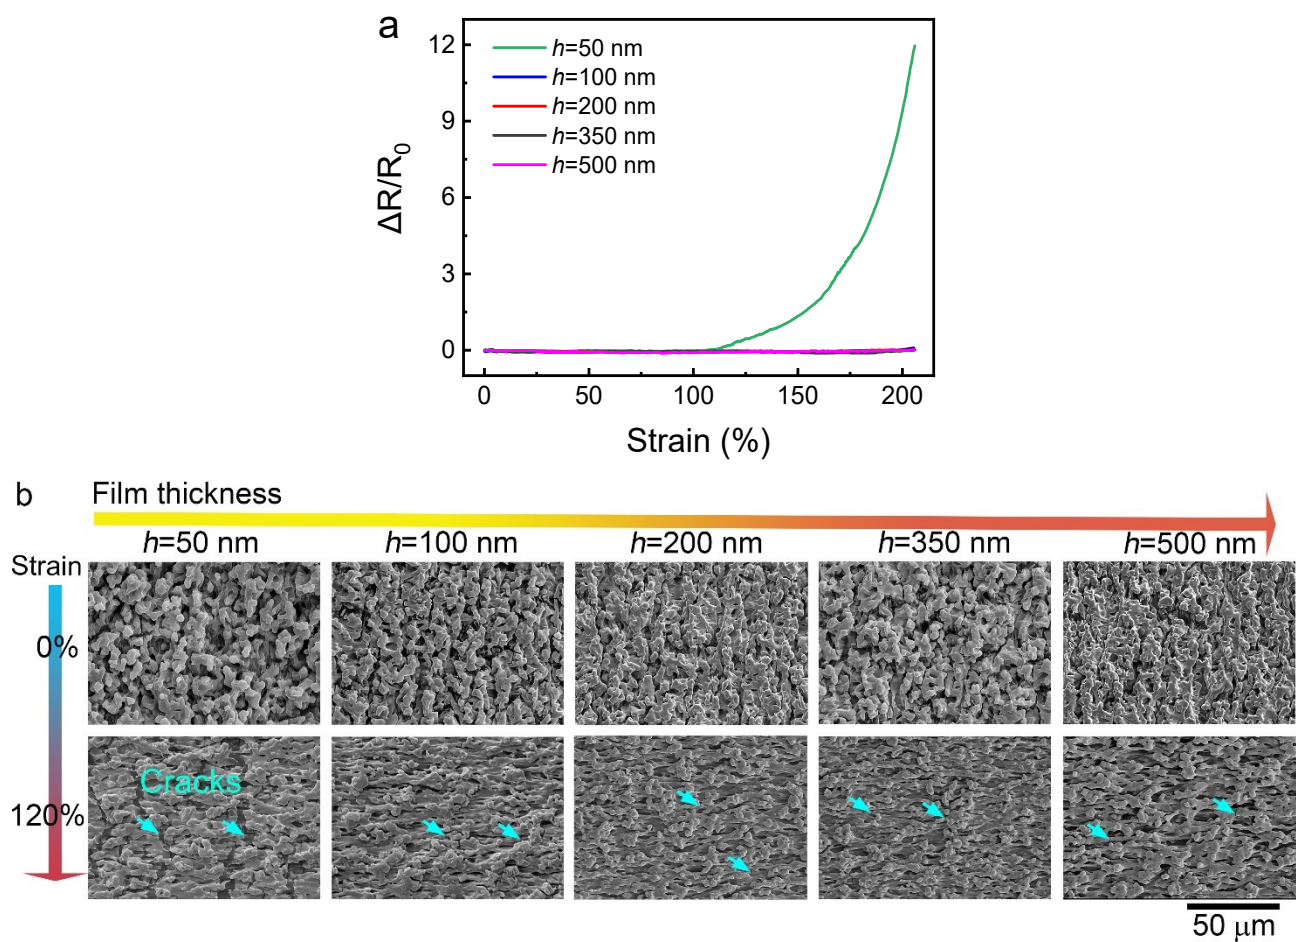

**Fig. S30.** (a) Variation of relative resistance change with applied strain. (b) SEM images of surface morphologies of the HMFs with different thicknesses at 0% and 120%.



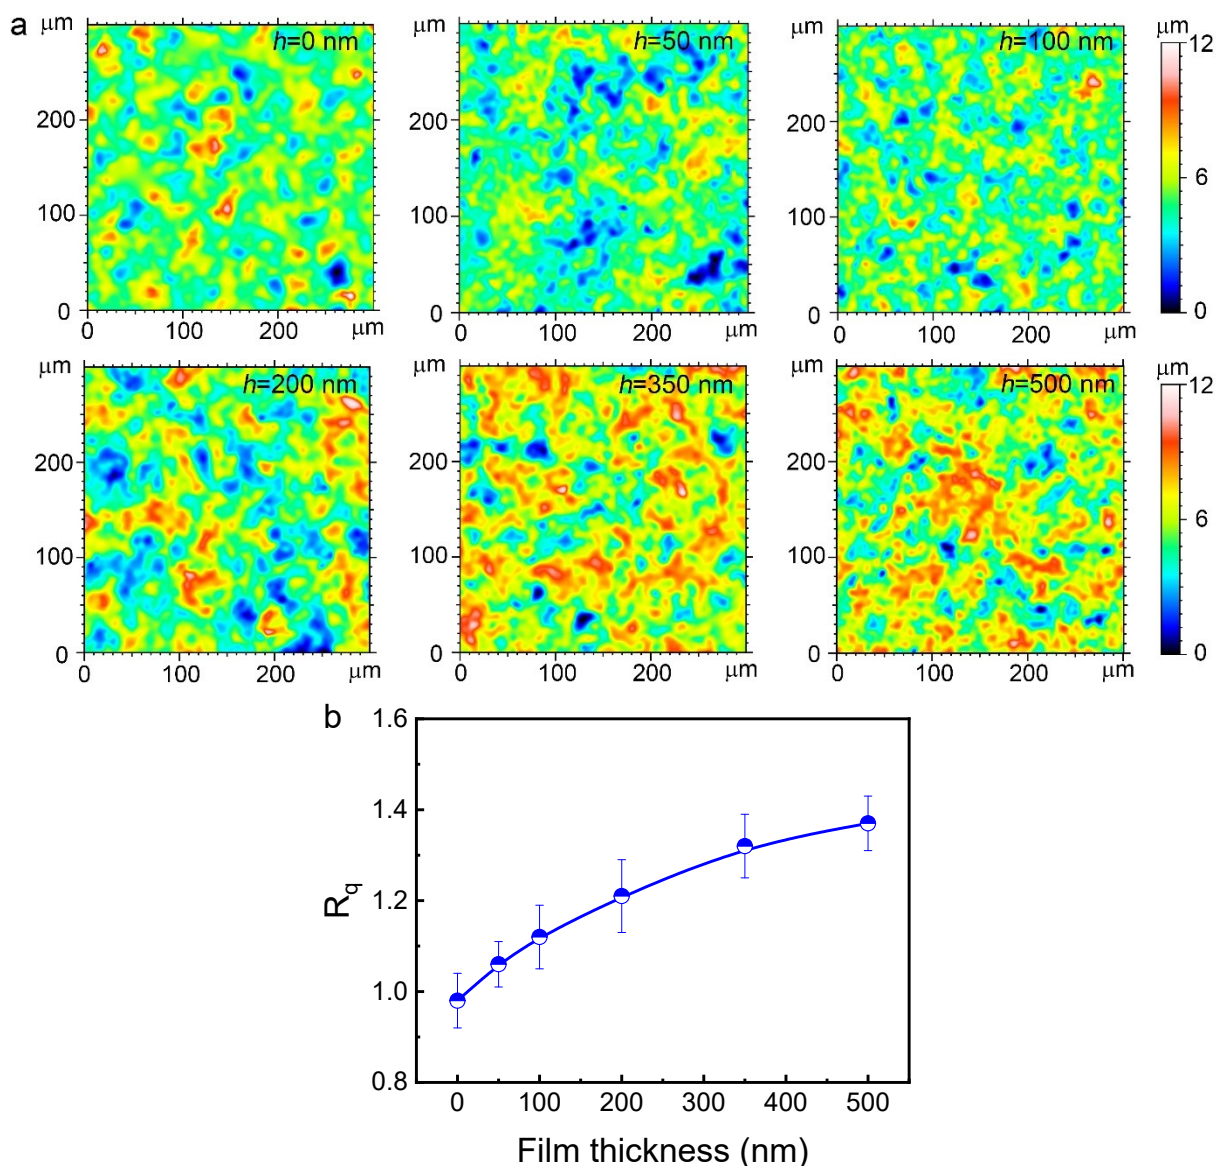

**Fig. S31.** (a) Topographic images for top view obtained by CLSM analysis for the microstructures of Ag films with different thicknesses sputtered on the microstructured PDMS sheet. (b) Dependence of surface roughness parameter  $R_q$  on Ag film thickness. The increase of surface irregularities with film thickness can be attributed to the shadowing effect induced by surface protrusions<sup>34,35</sup>.

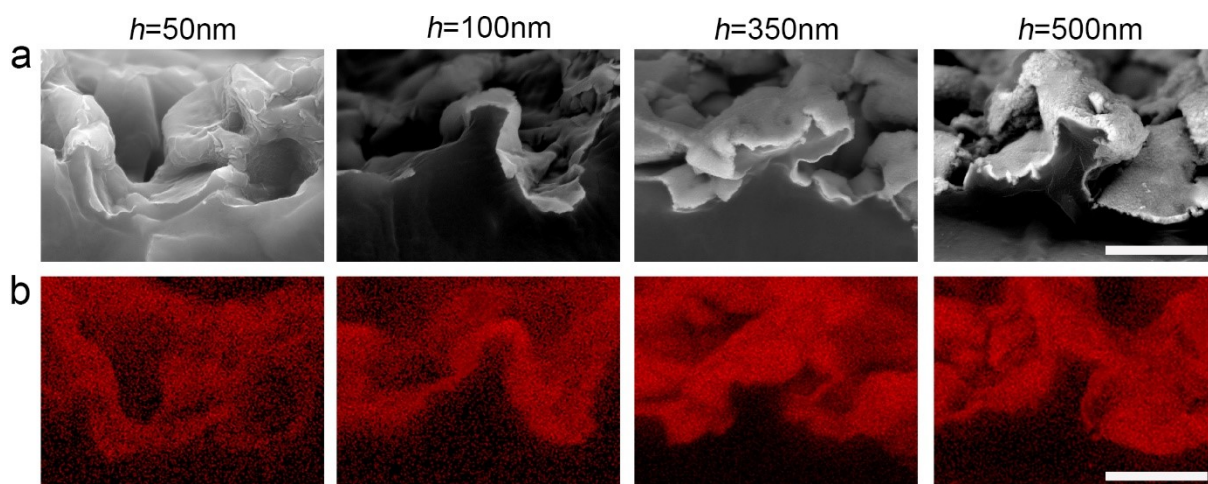

**Fig. S32.** (a) Cross-sectional SEM images and (b) EDS for the HMFs with different thicknesses (scale bar:  $5\ \mu\text{m}$ ).

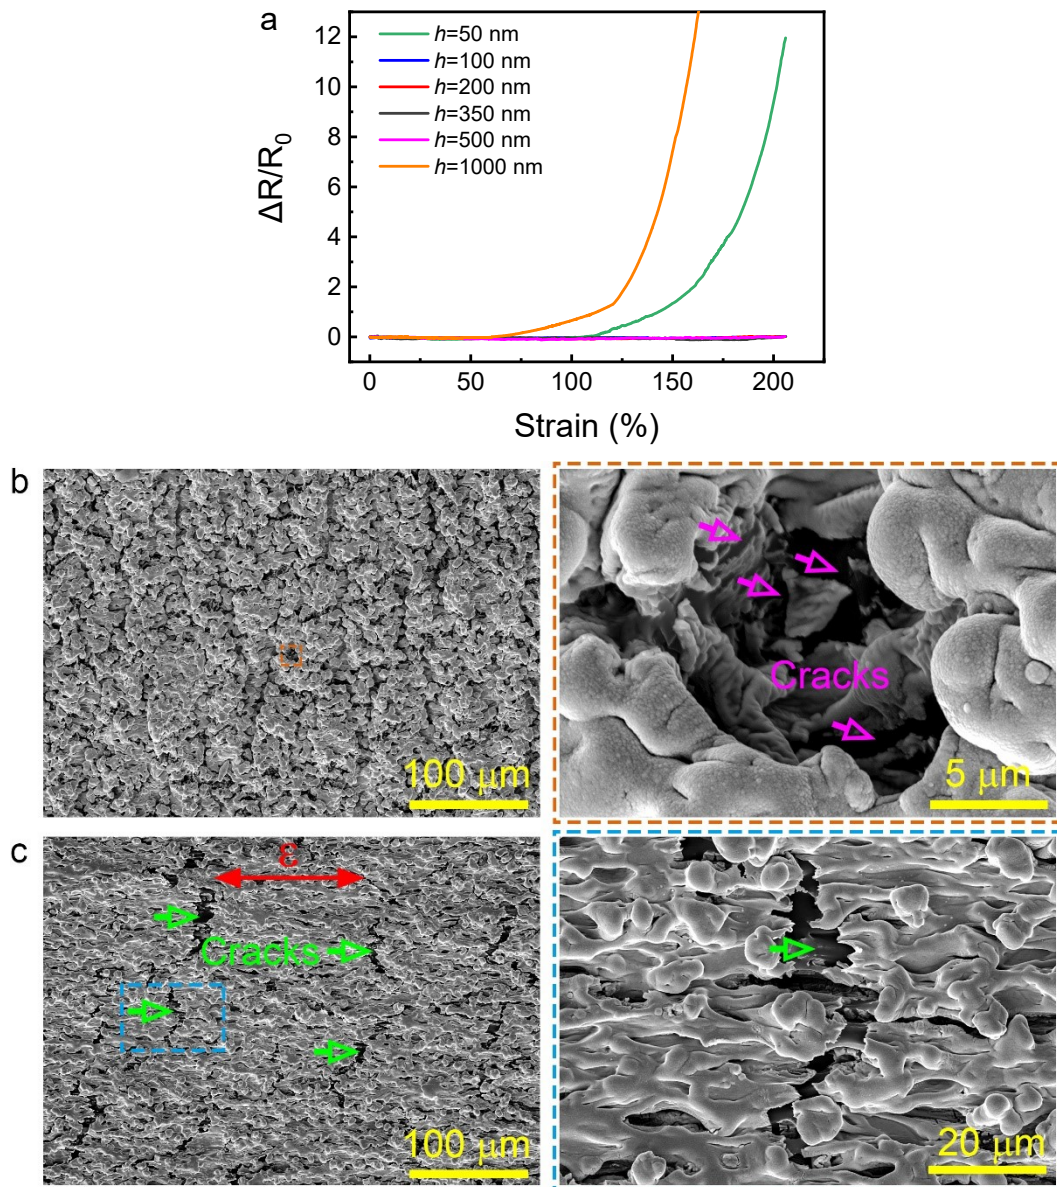

**Fig. S33.** (a) Variation of relative resistance change with applied strain for microstructured Ag films with different film thickness  $h$ . SEM images of the surface morphologies of microstructured Ag films with  $h = 1000$  nm at (b) 0% and (c) 120%.

It is revealed that many cracks, instead of wrinkles, were formed at the undercuts after film deposition and prestrain relaxation. According to the nonlinear buckling theory<sup>2, 4, 39</sup>, the wrinkle dimension (wavelength) scales with the film thickness. The undercut regions have insufficient room to accommodate the periodic wrinkles for the thick film (e.g.,  $h = 1000$  nm). Releasing the prestrain

applies a compressive stress to the metal film, leading to film bending. The excessive tensile strain at the top of wrinkle caused by bending will trigger the film cracking. Upon stretching, these cracks at the undercuts will propagate and merge into the long crack (Figure S33c), which impairs the stretchability of Ag film.

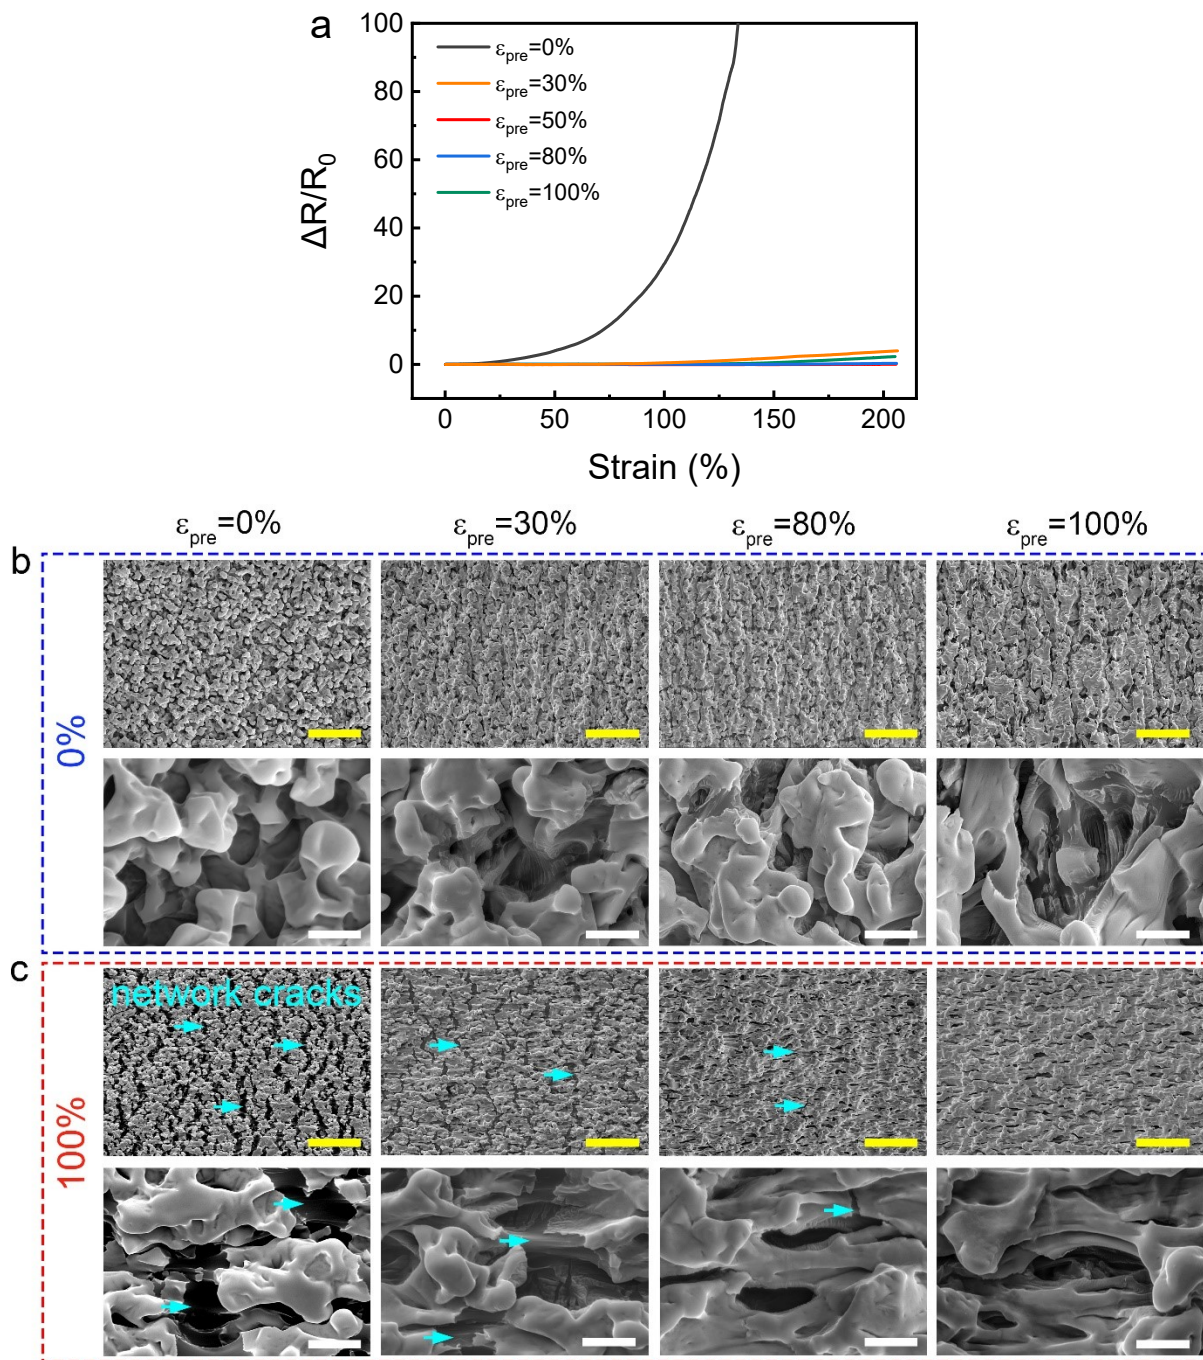

**Fig. S34.** (a) Variation of relative resistance change with applied strain for 200 nm-thick HMFs fabricated by different substrate pre-strains. SEM images of surface morphologies of the HMFs fabricated by different substrate pre-strains at (b) 0% and (c) 100% (yellow scale bar: 50  $\mu\text{m}$ ; white scale bar: 5  $\mu\text{m}$ ).

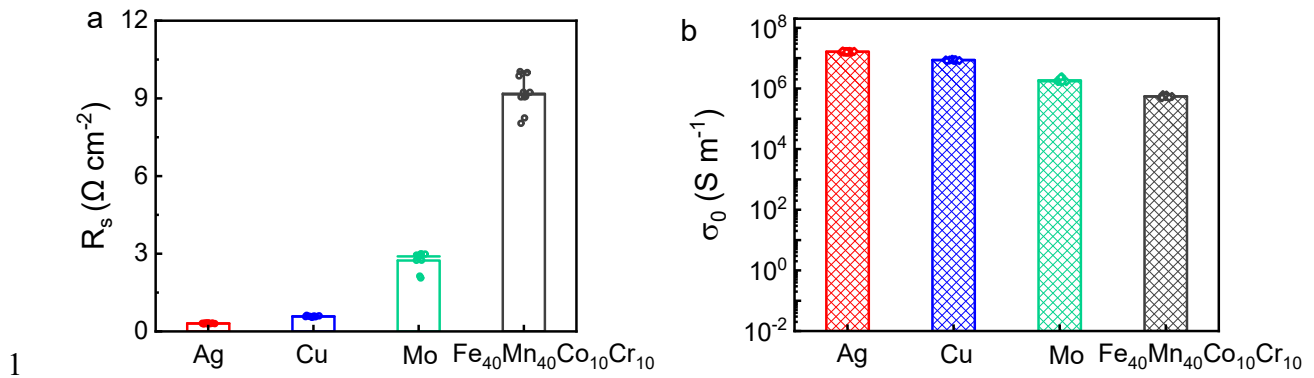

1  
2 **Fig. S35.** (a) Sheet resistance ( $R_s$ ) and (b) initial conductivity ( $\sigma_0$ ) of 200 nm-thick metal films (Ag,  
3 Cu, Mo, and  $\text{Fe}_{40}\text{Mn}_{40}\text{Co}_{10}\text{Cr}_{10}$ ) on hierarchical microstructured substrates. Generally, the electrical  
4 resistivity is related to microstructural defects (e.g., vacancies, dislocations, and grain boundaries)  
5 and lattice distortions, which reduce the electron mean free path and lead to electron scattering<sup>36 37</sup>.  
6 The  $\text{Fe}_{40}\text{Mn}_{40}\text{Co}_{10}\text{Cr}_{10}$  alloy film exhibits the highest sheet resistance because of the combined effect  
7 of smaller grain size (more grain boundaries) and the severe lattice distortion (highly-concentrated  
8 point defects)<sup>38</sup>.

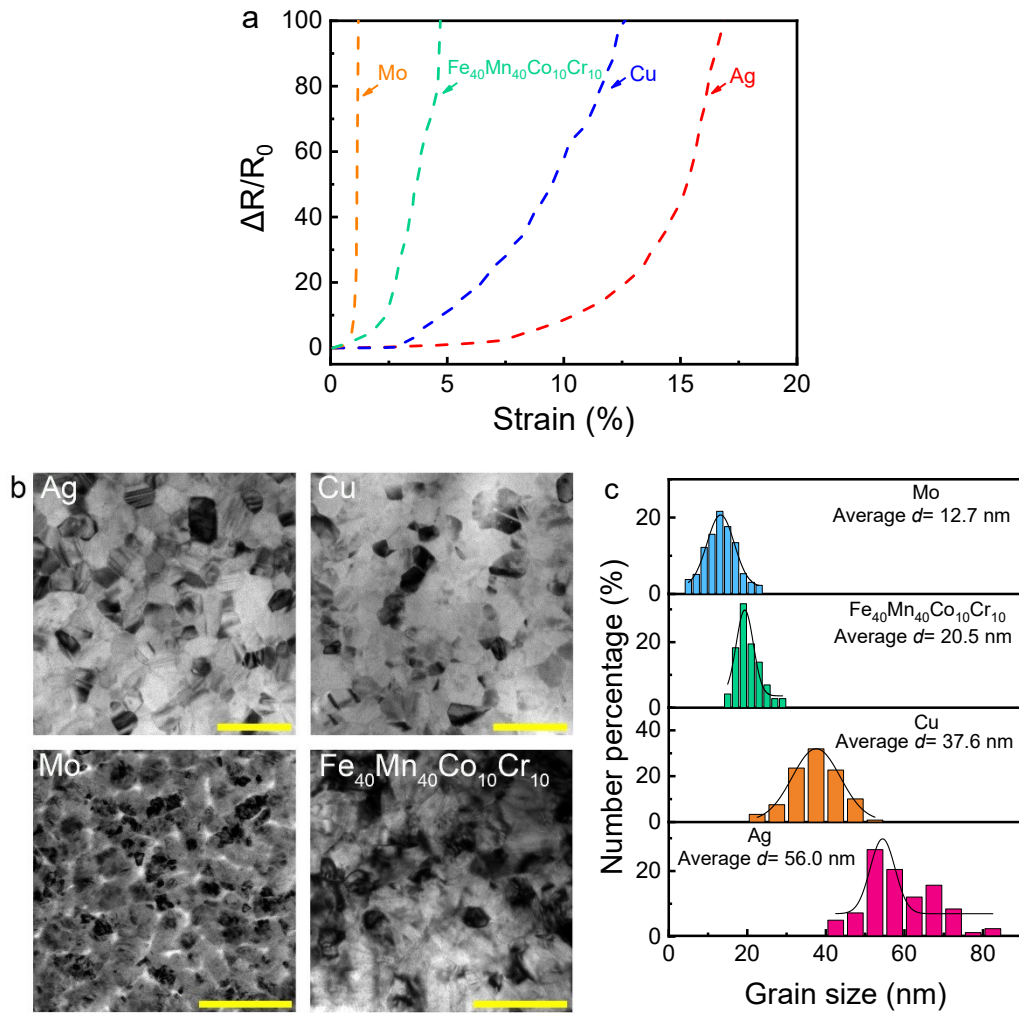

**Fig. S36.** (a) Electromechanical performances for various metal films on PDMS substrates without hierarchical microstructures. (b) TEM images of Ag films with various  $h = 200$  nm metal films (scale bar: 100 nm). (c) Grain size distributions for various metal films.

Mo has body-centered cubic (BCC) structure, while Ag, Cu, and  $\text{Fe}_{40}\text{Mn}_{40}\text{Co}_{10}\text{Cr}_{10}$  have face centered cubic (FCC) structure. FCC crystal is more ductile than BCC crystal because of the higher Peierls-Nabarro stress in BCC crystals as compared to FCC crystals<sup>39,40</sup>. Thus, the Mo film exhibits the lowest stretchability.

We performed transmission electron microscopy (TEM) to observe the microstructural features

of metal films with  $h = 200$  nm (Fig. S36b). Statistical results (Fig. S36c) indicate that the average grain size is 56.0 nm for Ag, 37.6 nm for Cu, 20.5 nm for Fe<sub>40</sub>Mn<sub>40</sub>Co<sub>10</sub>Cr<sub>10</sub>, and 12.7 nm for Mo. The stretchability of nanocrystalline metal films generally decreases with reducing grain size, because of dimensional constraints on dislocation activity<sup>41</sup>. Therefore, Ag film exhibits highest stretchability. Compared with Ag and Cu, the Fe<sub>40</sub>Mn<sub>40</sub>Co<sub>10</sub>Cr<sub>10</sub> alloy has a lower stretchability, because the severe lattice distortion strongly hinders the dislocation movement<sup>42-44</sup>.



## 2. Supporting Information Tables

**Table S1.** CLSM roughness analysis of the surface microstructures of sandpaper template and PDMS sheet (scan sizes:  $10 \times 10 \mu\text{m}$ ).

|                           | $R_q$ ( $\mu\text{m}$ ) | $R_a$ ( $\mu\text{m}$ ) | $R_{\text{max}}$ ( $\mu\text{m}$ ) | $R_{\text{sk}}$ | $R_{\text{ku}}$ | $R_{\text{sm}}$ ( $\mu\text{m}$ ) | $R_{\text{pc}}$ (1/mm) |
|---------------------------|-------------------------|-------------------------|------------------------------------|-----------------|-----------------|-----------------------------------|------------------------|
| <b>Sandpaper template</b> | $1.11 \pm 0.09$         | $0.90 \pm 0.05$         | $5.72 \pm 1.35$                    | $0.24 \pm 0.06$ | $2.51 \pm 0.84$ | $20.60 \pm 2.43$                  | $48.54 \pm 6.43$       |
| <b>PDMS sheet</b>         | $0.96 \pm 0.06$         | $0.78 \pm 0.04$         | $5.82 \pm 1.15$                    | $0.37 \pm 0.07$ | $3.15 \pm 0.93$ | $17.56 \pm 1.75$                  | $56.95 \pm 8.16$       |

International standard ISO 21920 is used for roughness analysis. Those parameters are as follows: average roughness ( $R_a$ ), root mean squared roughness ( $R_q$ ), maximum roughness ( $R_{\text{max}}$ ), skewness ( $R_{\text{sk}}$ ), kurtosis ( $R_{\text{ku}}$ ), mean width of profile elements ( $R_{\text{sm}}$ ), and peak counts ( $R_{\text{pc}}$ ).

**Table S2.** Comparison of the stretchability, the relative resistance change and stability with other stretchable metal-based conductors.

| <b>Materials</b>              | $\varepsilon_{max}$<br>(%) | $\Delta R/R_0$<br><b>at max strain</b> | <b>Stability</b><br><b>(Number of cycles)</b> | <b>Ref.</b>      |
|-------------------------------|----------------------------|----------------------------------------|-----------------------------------------------|------------------|
| Ag/PDMS                       | 200                        | 6.20                                   | N.A.                                          | 8                |
| Au/P-PDMS                     | 120                        | 32                                     | 1000@1%                                       | 9                |
| Ag-Cr-Cu-EGaIn/PDMS           | 85                         | 461                                    | 1100@40%                                      | 10               |
| Au/PDMS                       | 24                         | 100000                                 | 10000@11%                                     | 11               |
| Au/PDMS                       | 90                         | 1330                                   | 100@60%                                       | 12               |
| Pt/PDMS                       | 130                        | 4.1E7                                  | N.A.                                          | 13               |
| Au/PDMS                       | 120                        | 0.14                                   | 10000@50%                                     | 14               |
| Au+Au NWs/PDMS                | 60                         | 1.20                                   | 1000@60%                                      | 15               |
| Au/PDMS                       | 100                        | 3                                      | 5000@50%                                      | 16               |
| Pt/Silk                       | 110                        | 36.50                                  | 100@20%                                       | 17               |
| Cu-Cr/PDMS                    | 50                         | 5.40                                   | 1000@50%                                      | 18               |
| Cu/PDMS                       | 75                         | 46.50                                  | 1000@50%                                      | 19               |
| Cu/PDMS                       | 100                        | 408475                                 | 10000@40%                                     | 21               |
| Au+Au NWs/SEBS fiber          | 200                        | 1.43                                   | 5000@50%                                      | 20               |
| Au/Semi-polymerized PDMS      | 130                        | 25.25                                  | >10000@60%                                    | 22               |
| Pt/PU                         | 2                          | 41                                     | 5000@2%                                       | 23               |
| Pt/PU                         | 2                          | 46                                     | 10000@2%                                      | 24               |
| Cu-Al/PI                      | 2                          | 0.31                                   | N.A.                                          | 25               |
| Au/PDMS                       | 1                          | 80                                     | N.A.                                          | 26               |
| Pt/MPTMS                      | 185                        | 77                                     | 1000@50%                                      | 27               |
| Ag-FeO <sub>x</sub> /PDMS     | 295                        | 3.85                                   | >900@40%                                      | 28               |
| Au/PDMS                       | 300                        | 80                                     | 5000@100%                                     | 29               |
| Au/SEBS                       | 212                        | 62                                     | >600@20%                                      | 30               |
| Au/ PDMS <sub>0.9</sub> -IPDI | 100                        | 4.6                                    | 1000@50%                                      | 31               |
| Au/SEBS                       | 120                        | 15                                     | 1000@40%                                      | 32               |
| <b>Ag/PDMS</b>                | <b>206</b>                 | <b>0.007</b>                           | <b>&gt;15000@100%</b>                         | <b>This work</b> |
| <b>Ag/SEBS</b>                | <b>410</b>                 | <b>0.26</b>                            | <b>N.A.</b>                                   | <b>This work</b> |

**Table S3.** Summary of relevant parameters for the calculation of critical energy release rate.

| $h$<br>(nm) | $\sigma$<br>(MPa) | $E_s$<br>(MPa) | $E_f$<br>(GPa) | $\nu_s$ | $\nu_f$ | $\alpha$ | $\beta$ | $g(\alpha,\beta)$ | $G_c$<br>(GPa•nm) |
|-------------|-------------------|----------------|----------------|---------|---------|----------|---------|-------------------|-------------------|
| 50          | 684.56            | 2.20           | 71             | 0.50    | 0.38    | 0.99     | 0.25    | 9.98              | 2.82              |
| 100         | 626.85            | 2.20           | 71             | 0.50    | 0.38    | 0.99     | 0.25    | 9.98              | 4.73              |
| 200         | 599.81            | 2.20           | 71             | 0.50    | 0.38    | 0.99     | 0.25    | 9.98              | 8.66              |
| 350         | 563.68            | 2.20           | 71             | 0.50    | 0.38    | 0.99     | 0.25    | 9.98              | 13.38             |
| 500         | 515.99            | 2.20           | 71             | 0.50    | 0.38    | 0.99     | 0.25    | 9.98              | 16.02             |
| 1000        | 472.44            | 2.20           | 71             | 0.50    | 0.38    | 0.99     | 0.25    | 9.98              | 26.81             |

**Table S4.** Comparison of the initial conductivity, the stretchability, the relative resistance change and the quality factor with other stretchable conductors.

| <b>Materials</b>                 | $\epsilon_{max}$<br>(%) | $\sigma_0$<br>(S m <sup>-1</sup> ) | $\Delta R/R_0$<br>at max strain | $Q$<br>at max strain | <b>Stability</b><br>(Number of cycles) | <b>Ref.</b>      |
|----------------------------------|-------------------------|------------------------------------|---------------------------------|----------------------|----------------------------------------|------------------|
| CNT in fluorine rubber           | 134                     | 5700                               | 51                              | 0.03                 | 4000@25%                               | 45               |
| LMPs in elastomeric matrix       | 500                     | 2100000                            | 0.31                            | 16.29                | 8000@300%                              | 7                |
| LM sheath-core microfibers       | 740                     | 43500                              | 4                               | 1.85                 | 600@100%                               | 4                |
| bGaIn/VHB                        | 1200                    | 2060000                            | 4                               | 3                    | 1500@500%                              | 46               |
| Ag flakes in fluorine rubber     | 400                     | 400000                             | 106                             | 0.04                 | 100@50%                                | 47               |
| PEDOT:PSS                        | 800                     | 100000                             | 4482                            | 0.002                | 1000@100%                              | 48               |
| AgNWs/Au in SBS                  | 840                     | 3000000                            | 2649                            | 0.003                | 3000@30%                               | 49               |
| Graphene/PU                      | 1010                    | 124                                | 0.90                            | 11.26                | >4000@10%                              | 50               |
| (PEDOT/PSS/PBP)/TPE              | 900                     | 8000                               | 0.03                            | 290                  | 1766@300%                              | 51               |
| Ag flakes PAAm alginate hydrogel | 250                     | 37400                              | 70                              | 0.04                 | 1000@100%                              | 52               |
| Ag NPs in TPU                    | 115                     | 1100000                            | 20.20                           | 0.06                 | 10000@5%                               | 53               |
| EGaIn droplets dispersed in PDMS | 50                      | 137000                             | 0.04                            | 11.60                | 1000@50%                               | 54               |
| Au film deposited on PDMS        | 100                     | 41100000                           | 0.03                            | 33                   | 5000@50%                               | 16               |
| CNT/Ecoflex                      | 200                     | 0.56                               | 0.07                            | 28.57                | N.A.                                   | 55               |
| Au/PDMS                          | 50                      | 11000                              | 0.07                            | 17.86                | 3000@50%                               | 56               |
| EGaIn-rich layer on SEBS         | 250                     | 1200000                            | 1.70                            | 1.47                 | >100@200%                              | 57               |
| Au/PDMS                          | 300                     | 1600000                            | 77                              | 0.039                | 5000@100%                              | 29               |
| Graphene/PDMS                    | 90                      | 1000                               | 200                             | 45                   | N.A.                                   | 58               |
| PEDOT:PSS/PVA DN hydrogel        | 100                     | 1000                               | 1.20                            | 0.83                 | 1000@100%                              | 59               |
| Cu-LM/SIS                        | 1200                    | 1200000                            | 37.10                           | 32.34                | 1000@300%                              | 60               |
| Ag nanomaterials                 | 50                      | 3100000                            | 0.0026                          | 192                  | 1000@50%                               | 1                |
| <b>Ag/PDMS</b>                   | <b>206</b>              | <b>17000000</b>                    | <b>0.007</b>                    | <b>288.05</b>        | <b>&gt;15000@100%</b>                  | <b>This work</b> |

### 3. Supporting Information References

1. D. Jung, C. Lim, C. Park, Y. Kim, M. Kim, S. Lee, H. Lee, J. H. Kim, T. Hyeon and D. H. Kim, *Adv. Mater.*, 2022, **34**, e2200980.
2. X. P. Hao, C. Y. Li, C. W. Zhang, M. Du, Z. Ying, Q. Zheng and Z. L. Wu, *Adv. Funct. Mater.*, 2021, **31**, 2105481.
3. G. H. Lee, Y. R. Lee, H. Kim, D. A. Kwon, H. Kim, C. Yang, S. Q. Choi, S. Park, J. W. Jeong and S. Park, *Nat Commun*, 2022, **13**, 2643.
4. L. Zheng, M. Zhu, B. Wu, Z. Li, S. Sun and P. Wu, *Sci Adv*, 2021, **7**, eabg4041.
5. Z. Ma, Q. Huang, Q. Xu, Q. Zhuang, X. Zhao, Y. Yang, H. Qiu, Z. Yang, C. Wang, Y. Chai and Z. Zheng, *Nat Mater*, 2021, **20**, 859-868.
6. R. Guo, H. Wang, G. Chen, B. Yuan, Y. Zhang and J. Liu, *Appl. Mater. Today*, 2020, **20**, 100738.
7. W. Lee, H. Kim, I. Kang, H. Park, J. Jung, H. Lee, H. Park, J. S. Park, J. M. Yuk, S. Ryu, J.-W. Jeong and J. Kang, *Science* 2022, **378**, 637-641.
8. B. Feng, T. Sun, W. Wang, Y. Xiao, J. Huo, Z. Deng, G. Bian, Y. Wu, G. Zou, W. Wang, T. Ren and L. Liu, *Adv. Mater.*, 2022, **35**, e2208568.
9. J. Zhu, X. Wu, J. Jan, S. Du, J. Evans and A. C. Arias, *ACS Appl. Mater. Interfaces*, 2021, **13**, 38105-38113.
10. B. Feng, X. Jiang, G. Zou, W. Wang, T. Sun, H. Yang, G. Zhao, M. Dong, Y. Xiao, H. Zhu and L. Liu, *Adv. Funct. Mater.*, 2021, **31**, 2102359.
11. C. Cho, P. Kang, A. Taqieddin, Y. Jing, K. Yong, J. M. Kim, M. F. Haque, N. R. Aluru and S. Nam, *Nat Electron*, 2021, **4**, 126-133.
12. J. Shi, S. Lv, L. Wang, Z. Dai, S. Yang, L. Zhao, H. Tian, M. Du, H. Li and Y. Fang, *ACS Appl. Mater. Interfaces*, 2019, **6**, 1901223.
13. W. Miao, Y. Yao, Z. Zhang, C. Ma, S. Li, J. Tang, H. Liu, Z. Liu, D. Wang, M. A. Camburn, J. C. Fang, R. Hao, X. Fang, S. Zheng, N. Hu and X. Wang, *Nat Commun*, 2019, **10**, 3862.
14. N. Matsuhisa, Y. Jiang, Z. Liu, G. Chen, C. Wan, Y. Kim, J. Kang, H. Tran, H. C. Wu, I. You, Z. Bao and X. Chen, *Adv. Electron. Mater.*, 2019, **5**, 1900347.
15. S. Gong, L. W. Yap, B. Zhu, Q. Zhai, Y. Liu, Q. Lyu, K. Wang, M. Yang, Y. Ling, D. T. H. Lai, F. Marzbanrad and W. Cheng, *Adv. Mater.*, 2019, **31**, e1903789.
16. B. Zhang, J. Lei, D. Qi, Z. Liu, Y. Wang, G. Xiao, J. Wu, W. Zhang, F. Huo and X. Chen, *Adv. Funct. Mater.*, 2018, **28**, 1801683.
17. G. Chen, N. Matsuhisa, Z. Liu, D. Qi, P. Cai, Y. Jiang, C. Wan, Y. Cui, W. R. Leow, Z. Liu, S. Gong, K. Q. Zhang, Y. Cheng and X. Chen, *Adv. Mater.*, 2018, **30**, e1800129.
18. H. B. Lee, C. W. Bae, T. Duy le, I. Y. Sohn, D. I. Kim, Y. J. Song, Y. J. Kim and N. E. Lee, *Adv. Mater.*, 2016, **28**, 3069-3077.
19. R. Guo, Y. Yu, J. Zeng, X. Liu, X. Zhou, L. Niu, T. Gao, K. Li, Y. Yang, F. Zhou and Z. Zheng, *Adv. Sci*, 2015, **2**, 1400021.
20. Y. Zhao, D. Dong, S. Gong, L. Brassart, Y. Wang, T. An and W. Cheng, *Adv. Electron. Mater.*, 2018, **5**, 1800462.
21. T. Zhu, K. Wu, Y. Xia, C. Yang, J. Chen, Y. Wang, J. Zhang, X. Pu, G. Liu and J. Sun, *Nano Lett.*, 2022, **22**, 6637-6646.
22. Z. Liu, H. Wang, P. Huang, J. Huang, Y. Zhang, Y. Wang, M. Yu, S. Chen, D. Qi, T. Wang, Y. Jiang, G. Chen, G. Hu, W. Li, J. Yu, Y. Luo, X. J. Loh, B. Liedberg, G. Li and X. Chen, *Adv. Mater.*, 2019, **31**, e1901360.
23. D. Kang, P. V. Pikhitsa, Y. W. Choi, C. Lee, S. S. Shin, L. Piao, B. Park, K. Y. Suh, T. I. Kim and M. Choi, *Nature*, 2014, **516**, 222-226.

24. B. Park, J. Kim, D. Kang, C. Jeong, K. S. Kim, J. U. Kim, P. J. Yoo and T. I. Kim, *Adv. Mater.*, 2016, **28**, 8130-8137.
25. X. Wu, H. Chen, X. Luo, D. Wang, P. Schaaf and G. Zhang, *Adv. Mater. Technol.*, 2021, **6**, 2100524.
26. T. Yang, X. Li, X. Jiang, S. Lin, J. Lao, J. Shi, Z. Zhen, Z. Li and H. Zhu, *Mater. Horizons*, 2016, **3**, 248-255.
27. J. D. Pegan, J. Zhang, M. Chu, T. Nguyen, S. J. Park, A. Paul, J. Kim, M. Bachman and M. Khine, *Nanoscale*, 2016, **8**, 17295-17303.
28. T. Sun, B. Feng, J. Huo, Y. Xiao, J. Peng, Z. Li, W. Wang, L. Liu, G. Zou and W. Wang, *Mater Horiz*, 2023, **10**, 2525-2534.
29. Z. Jiang, N. Chen, Z. Yi, J. Zhong, F. Zhang, S. Ji, R. Liao, Y. Wang, H. Li, Z. Liu, Y. Wang, T. Yokota, X. Liu, K. Fukuda, X. Chen and T. Someya, *Nat Electron*, 2022, **5**, 784-793.
30. Y. Jiang, S. Ji, J. Sun, J. Huang, Y. Li, G. Zou, T. Salim, C. Wang, W. Li, H. Jin, J. Xu, S. Wang, T. Lei, X. Yan, W. Y. X. Peh, S. C. Yen, Z. Liu, M. Yu, H. Zhao, Z. Lu, G. Li, H. Gao, Z. Liu, Z. Bao and X. Chen, *Nature*, 2023, **614**, 456-462.
31. D. Yang, G. Tian, C. Liang, Z. Yang, Q. Zhao, J. Chen, C. Ma, Y. Jiang, N. An, Y. Liu and D. Qi, *Adv. Funct. Mater.*, 2023, **33**, 2300412.
32. H. Li, F. Han, L. Wang, L. Huang, O. W. Samuel, H. Zhao, R. Xie, P. Wang, Q. Tian, Q. Li, Y. Zhao, M. Yu, J. Sun, R. Yang, X. Zhou, F. Li, G. Li, Y. Lu, P. Guo and Z. Liu, *Adv. Funct. Mater.*, 2023, **33**, 2300859.
33. J. L. Beuth and JR, *Int. J. Solids Structures* 1992, **29**, 1657-1675.
34. H. Liang, J. Xu, D. Zhou, X. Sun, S. Chu and Y. Bai, *Ceramics International*, 2016, **42**, 2642-2647.
35. I. Petrov, P. B. Barna, L. Hultman and J. E. Greene, *J. Vac. Sci. Technol. A* 2003, **21**, 117-128.
36. H. Kim, S. Nam, A. Roh, M. Son, M.-H. Ham, J.-H. Kim and H. Choi, *International Journal of Refractory Metals and Hard Materials*, 2019, **80**, 286-291.
37. T. Broom, *Advances in Physics*, 1954, **3**, 26-83.
38. W. Huo, X. Liu, S. Tan, F. Fang, Z. Xie, J. Shang and J. Jiang, *Applied Surface Science*, 2018, **439**, 222-225.
39. K. T. Kashyap, A. Bhat, P. G. Koppad and K. B. Puneeth, *Computational Materials Science*, 2012, **56**, 172-173.
40. Z. Wu, H. Bei, G. M. Pharr and E. P. George, *Acta Mater.*, 2014, **81**, 428-441.
41. N. Lu, Z. Suo and J. J. Vlassak, *Acta Mater.*, 2010, **58**, 1679-1687.
42. J. Lia, P. K. Liawf, Y. Chena, X. X. , H. Wang, C. Jianga, B. Liud, Q. Fang, Y. Liu, Y. Yang, P. K. Liaw and C. T. Liue, *Proc. Natl Acad. Sci. USA*, 2022, **119**, e2200607119.
43. T. J. Jang, W. S. Choi, D. W. Kim, G. Choi, H. Jun, A. Ferrari, F. Körmann, P.-P. Choi and S. S. Sohn, *Nat Commun*, 2021, **12**, 4703.
44. Q. Fang, W. Lu, Y. Chen, H. Feng, P. K. Liaw and J. Li, *J Mech Phys Solids*, 2022, **169**, 105067.
45. T. Sekitani, Y. Noguchi, K. Hata, T. Fukushima, T. Aida and T. Someya, *Science*, 2008, **321**, 1468-1472.
46. S. Liu, D. S. Shah and R. Kramer-Bottiglio, *Nat Mater*, 2021, **20**, 851-858.
47. N. Matsuhisa, D. Inoue, P. Zalar, H. Jin, Y. Matsuba, A. Itoh, T. Yokota, D. Hashizume and T. Someya, *Nat Mater*, 2017, **16**, 834-840.
48. Y. Wang, C. Zhu, R. Pfattner, H. Yan, L. Jin, S. Chen, F. Molina-Lopez, F. Lissel, J. Liu, N. I. Rabiah, Z. Chen, J. W. Chung, C. Linder, M. F. Toney, B. Murmann and Z. Bao, *Sci Adv*, 2017, **3**, e1602076.
49. S. Choi, S. I. Han, D. Jung, H. J. Hwang, C. Lim, S. Bae, O. K. Park, C. M. Tschabrunn, M. Lee, S. Y. Bae, J. W. Yu, J. H. Ryu, S. W. Lee, K. Park, P. M. Kang, W. B. Lee, R. Nezafat, T. Hyeon and D. H. Kim, *Nat Nanotechnol*, 2018, **13**, 1048-1056.
50. F. Sun, M. Tian, X. Sun, T. Xu, X. Liu, S. Zhu, X. Zhang and L. Qu, *Nano Lett.*, 2019, **19**, 6592-6599.
51. J. Zhou, G. Tian, G. Jin, Y. Xin, R. Tao and G. Lubineau, *Adv. Funct. Mater.*, 2019, **30**, 1907316.
52. Y. Ohm, C. Pan, M. J. Ford, X. Huang, J. Liao and C. Majidi, *Nat Electron*, 2021, **4**, 185-192.

53. Y. Kim, J. Zhu, B. Yeom, M. Di Prima, X. Su, J. G. Kim, S. J. Yoo, C. Uher and N. A. Kotov, *Nature*, 2013, **500**, 59-63.
54. E. J. Markvicka, M. D. Bartlett, X. Huang and C. Majidi, *Nat Mater*, 2018, **17**, 618-624.
55. C. Choi, J. M. Lee, S. H. Kim, S. J. Kim, J. Di and R. H. Baughman, *Nano Lett.*, 2016, **16**, 7677-7684.
56. M. Kong, I. You, G. Lee, G. Park, J. Kim, D. Park and U. Jeong, *Adv. Mater.*, 2021, **33**, e2100299.
57. X. Li, M. Li, J. Xu, J. You, Z. Yang and C. Li, *Nat Commun*, 2019, **10**, 3514.
58. Z. Chen, W. Ren, L. Gao, B. Liu, S. Pei and H. M. Cheng, *Nat Mater*, 2011, **10**, 424-428.
59. G. Li, K. Huang, J. Deng, M. Guo, M. Cai, Y. Zhang and C. F. Guo, *Adv. Mater.*, 2022, **34**, e2200261.
60. Y. Lia, T. Fang, J. Zhang, H. Zhua, Y. Suna, S. Wang, Y. Lua and D. Kong, *Proc. Natl Acad. Sci. USA*, 2023, **121**, e2300953120.
